# Supplementary material for: Deregulation of L1 retrotransposon-encoded protein expression in oral cancer recurrence
Source: Research Square preprint supplement (doi:10.21203/rs.3.rs-6319447/v1), 2025-05-06
Supplement: Supplementary file 1 [file 4d566a61b30203f702369999.pdf]

Supple Figure 1:

Workflow of QuPath Analysis software to measure the DAB stain intensity

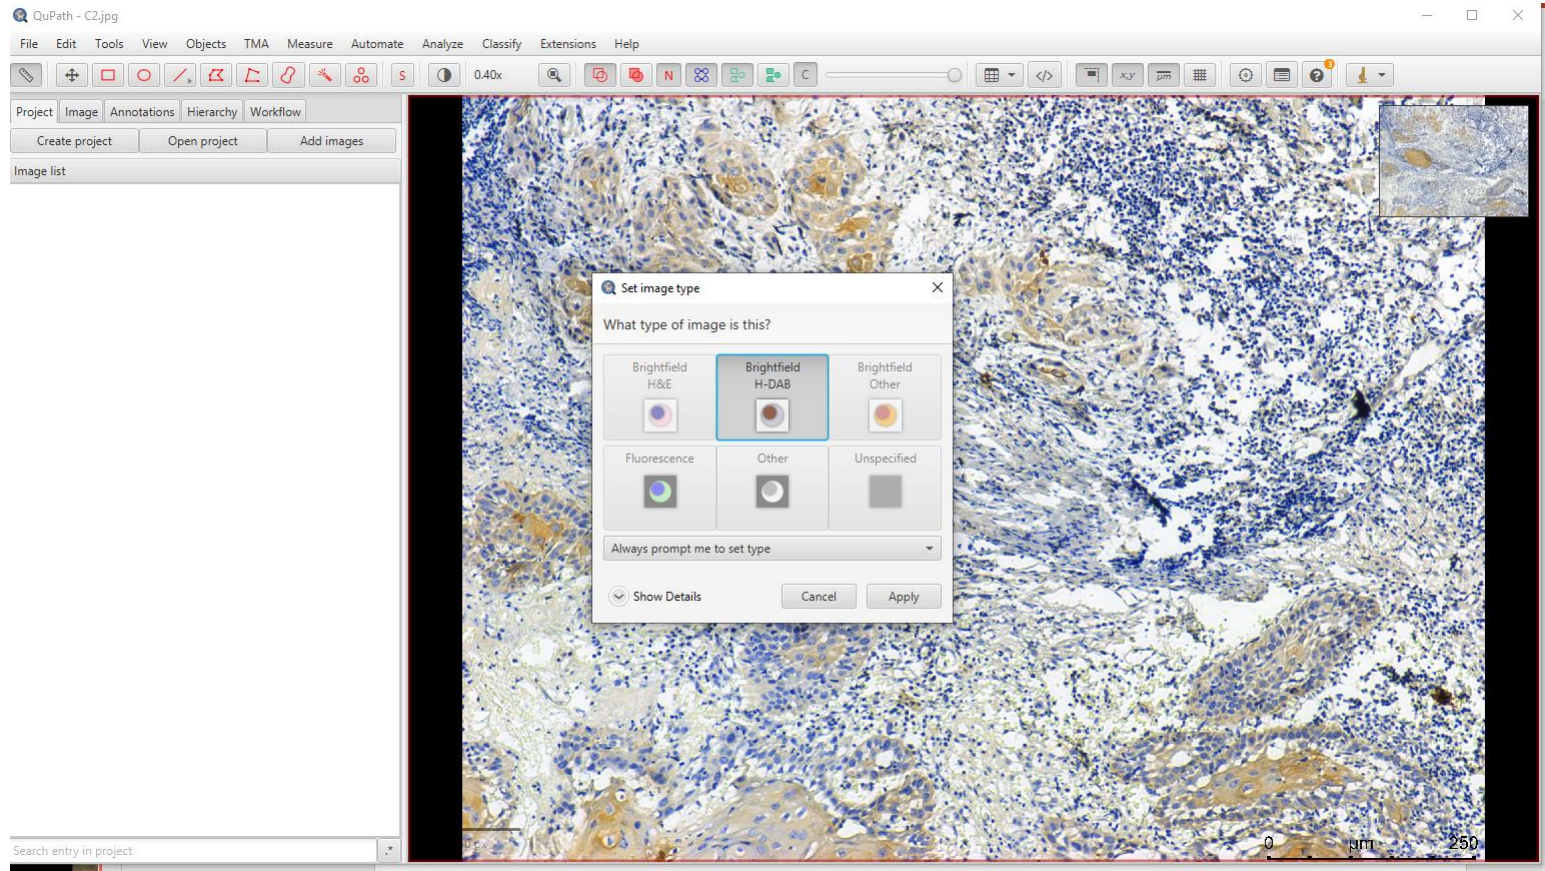

Open QuPath software, open image, select H-DAB and apply

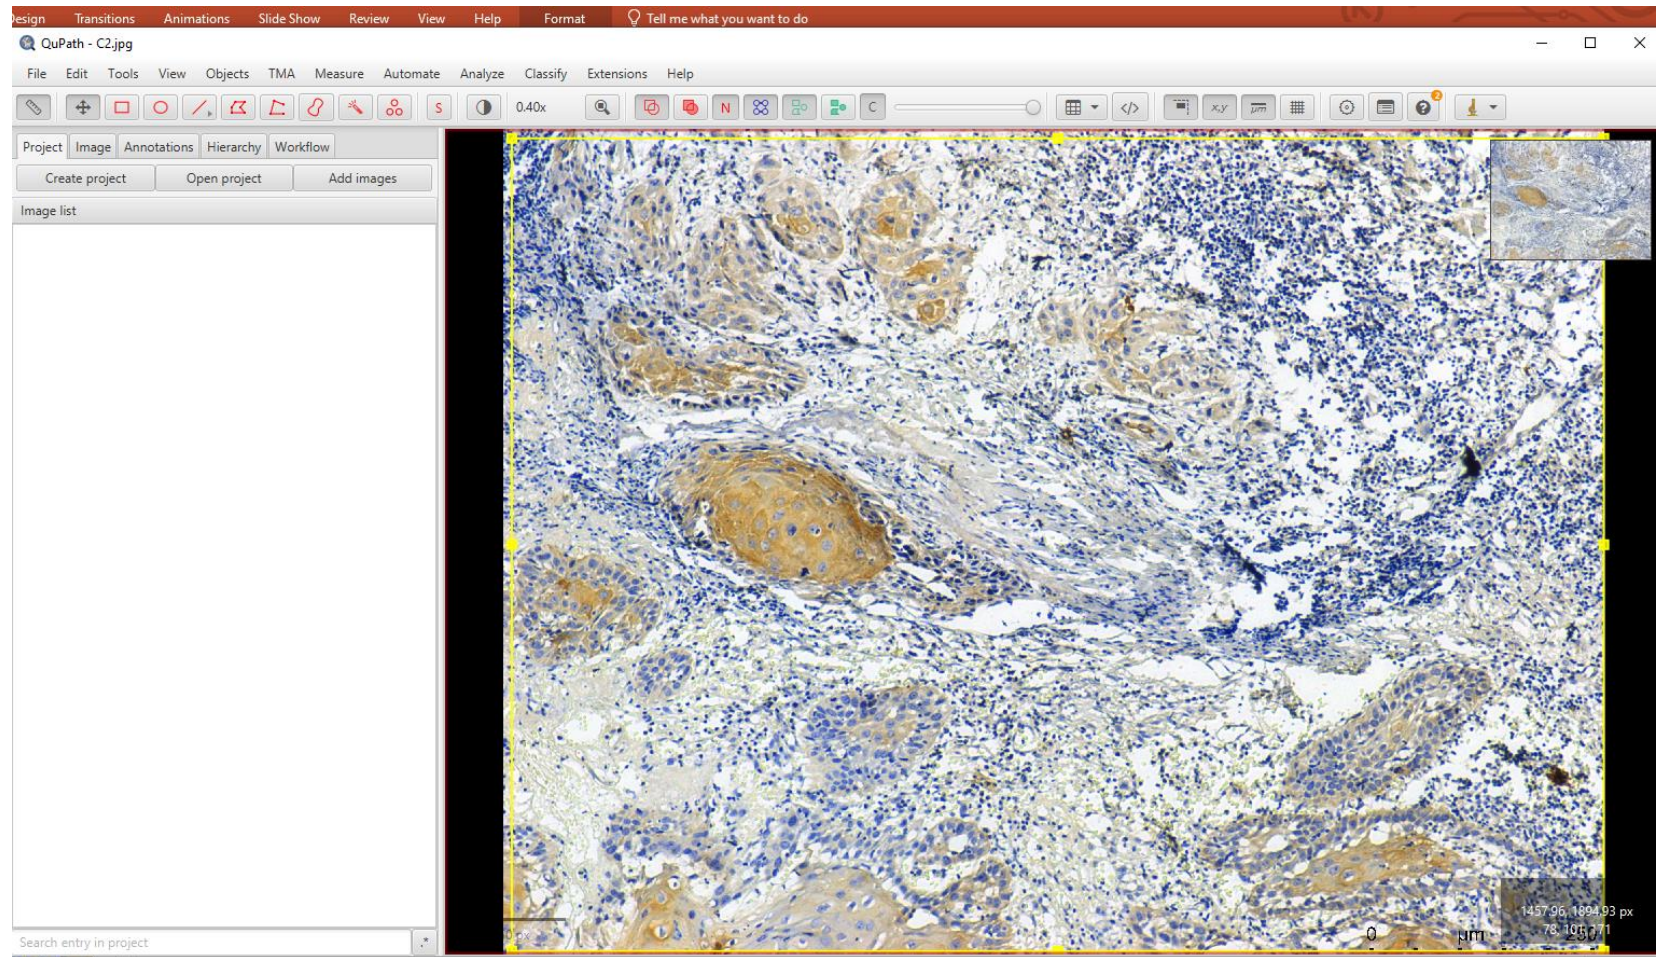

Go to tools, select rectangle icon and using the rectangle icon select the area of the image need to be analysed (borders of the selected area show yellow in color)



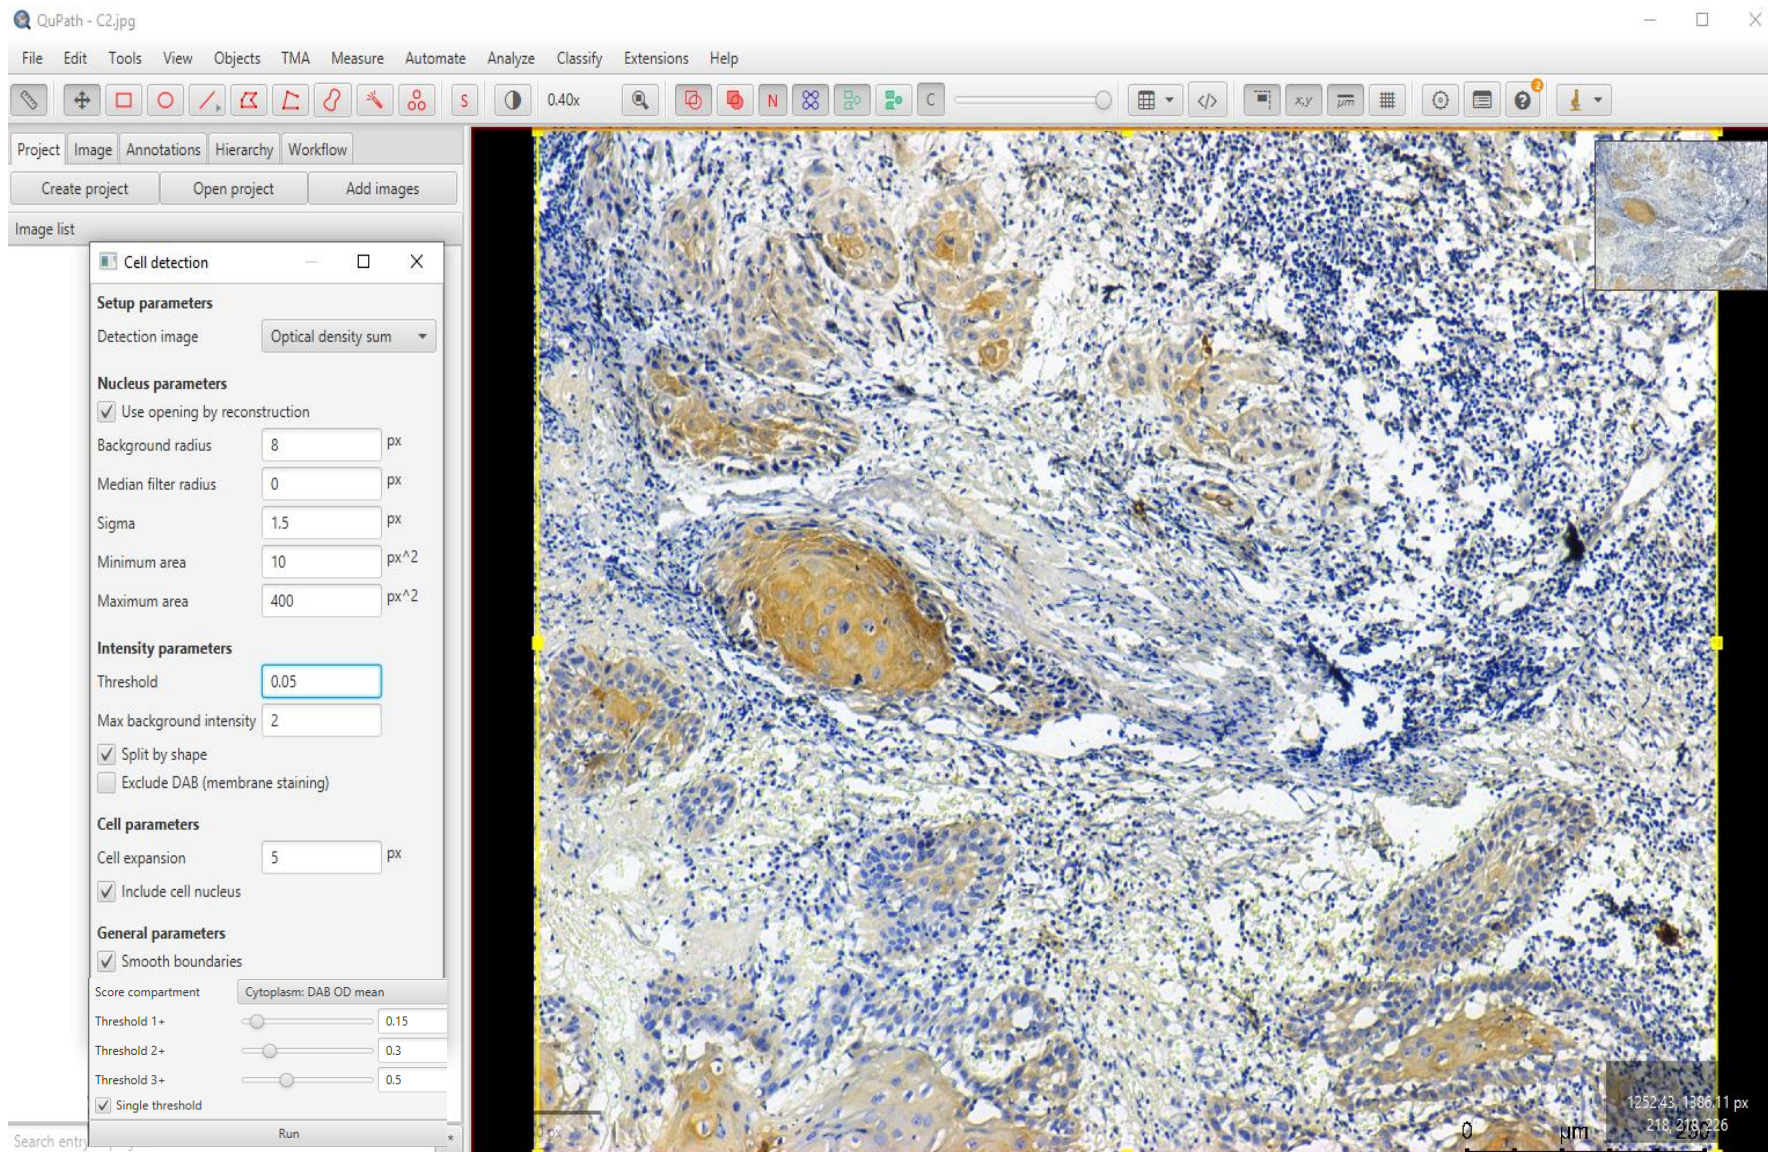

Go to analyze, select cell detection and finally positive cell detection.

Supple Fig 1



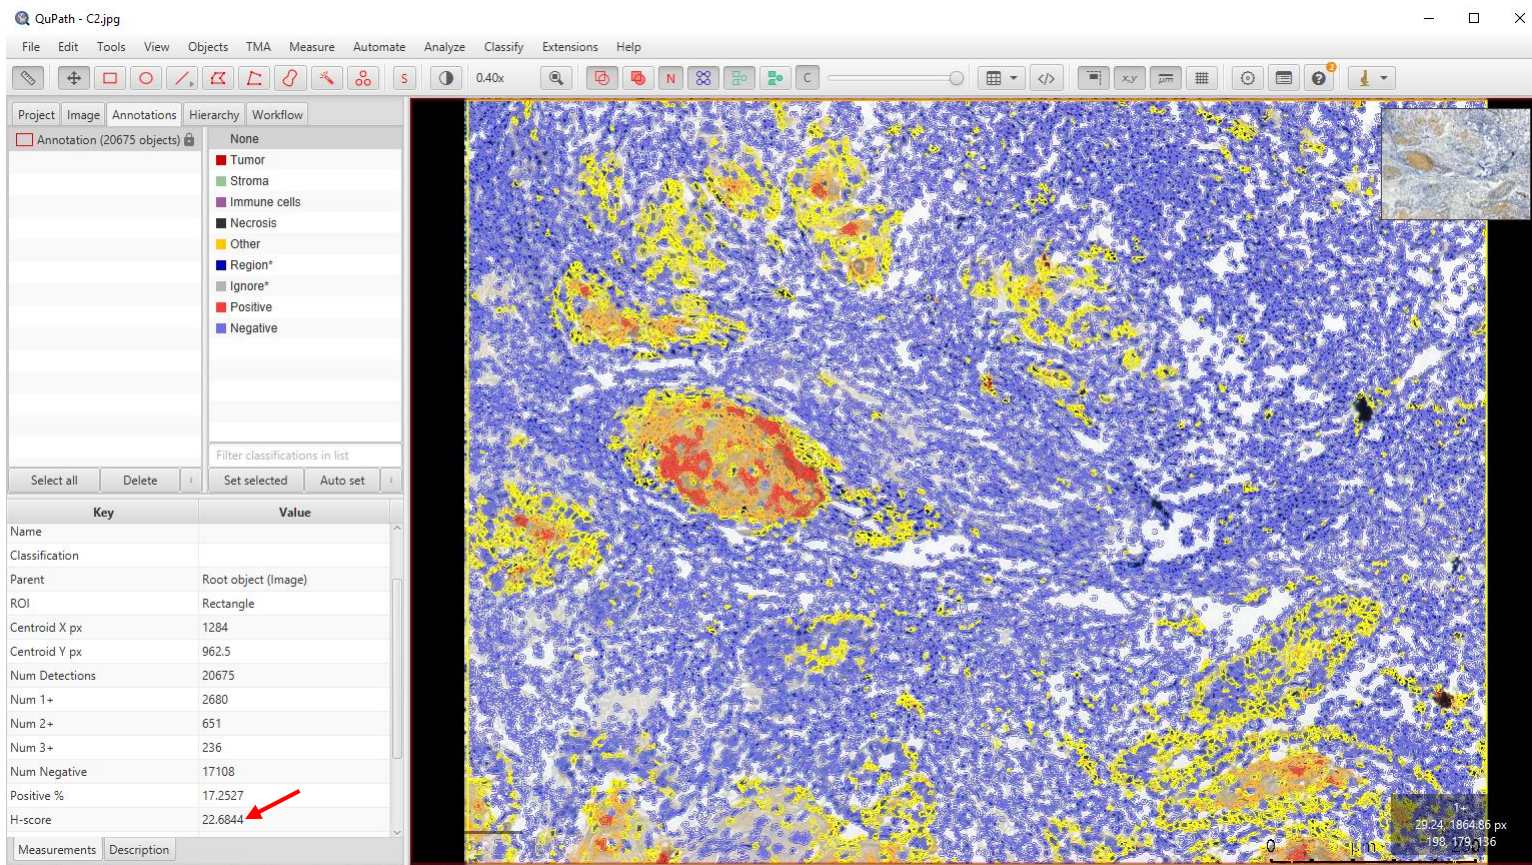

H-Score obtained as marked by red arrow. In this case the H-score value is 22



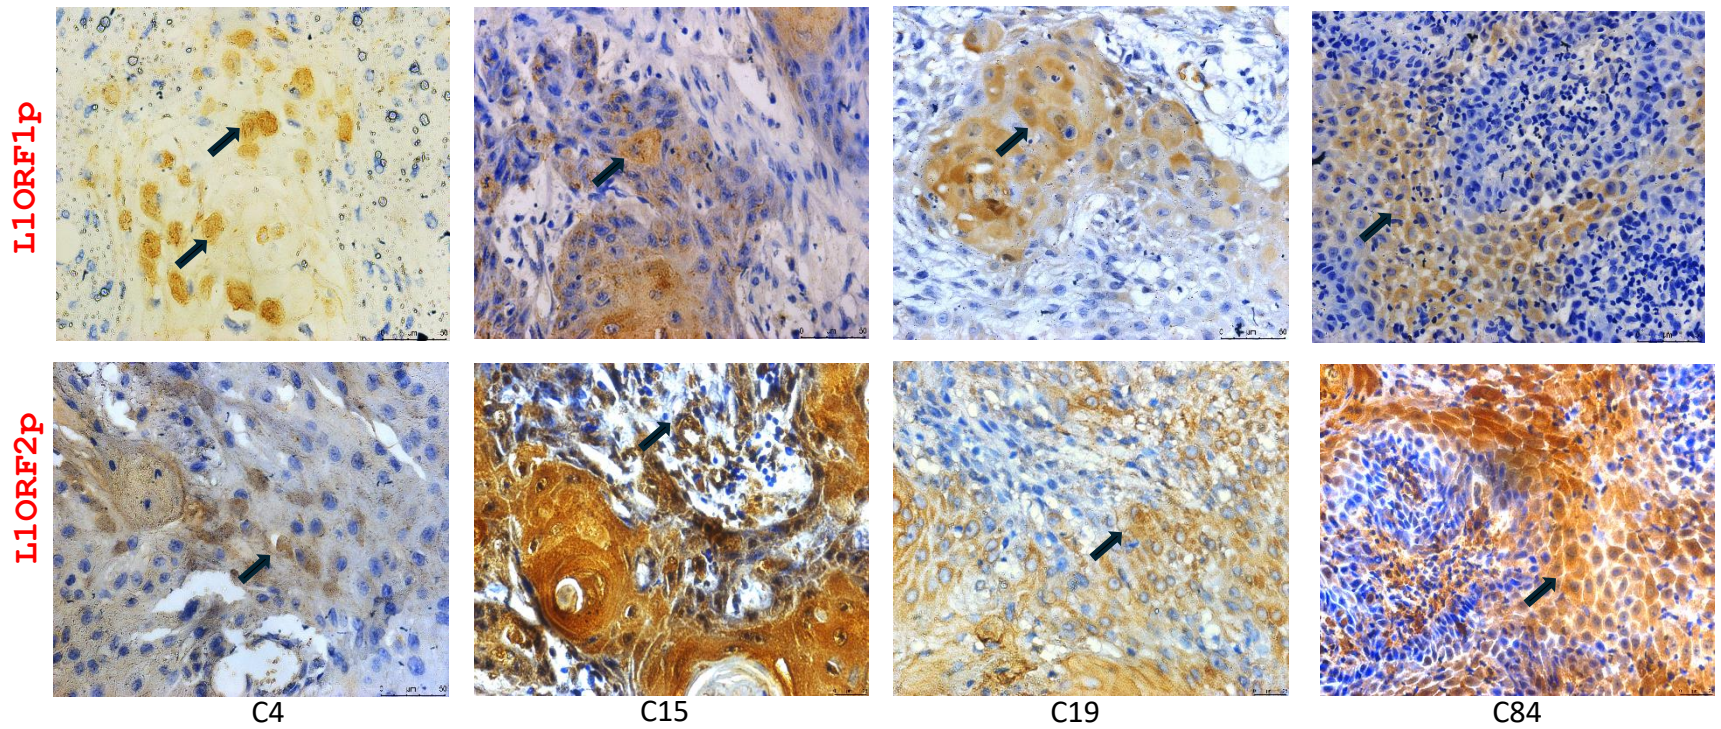

Black arrow mark denotes nuclear staining of L1ORF1p and L1ORF2p

Supple Fig 2: Distribution of L1ORF1p and L1ORF2p in the nucleus and cytoplasm in the operated oral cancer samples



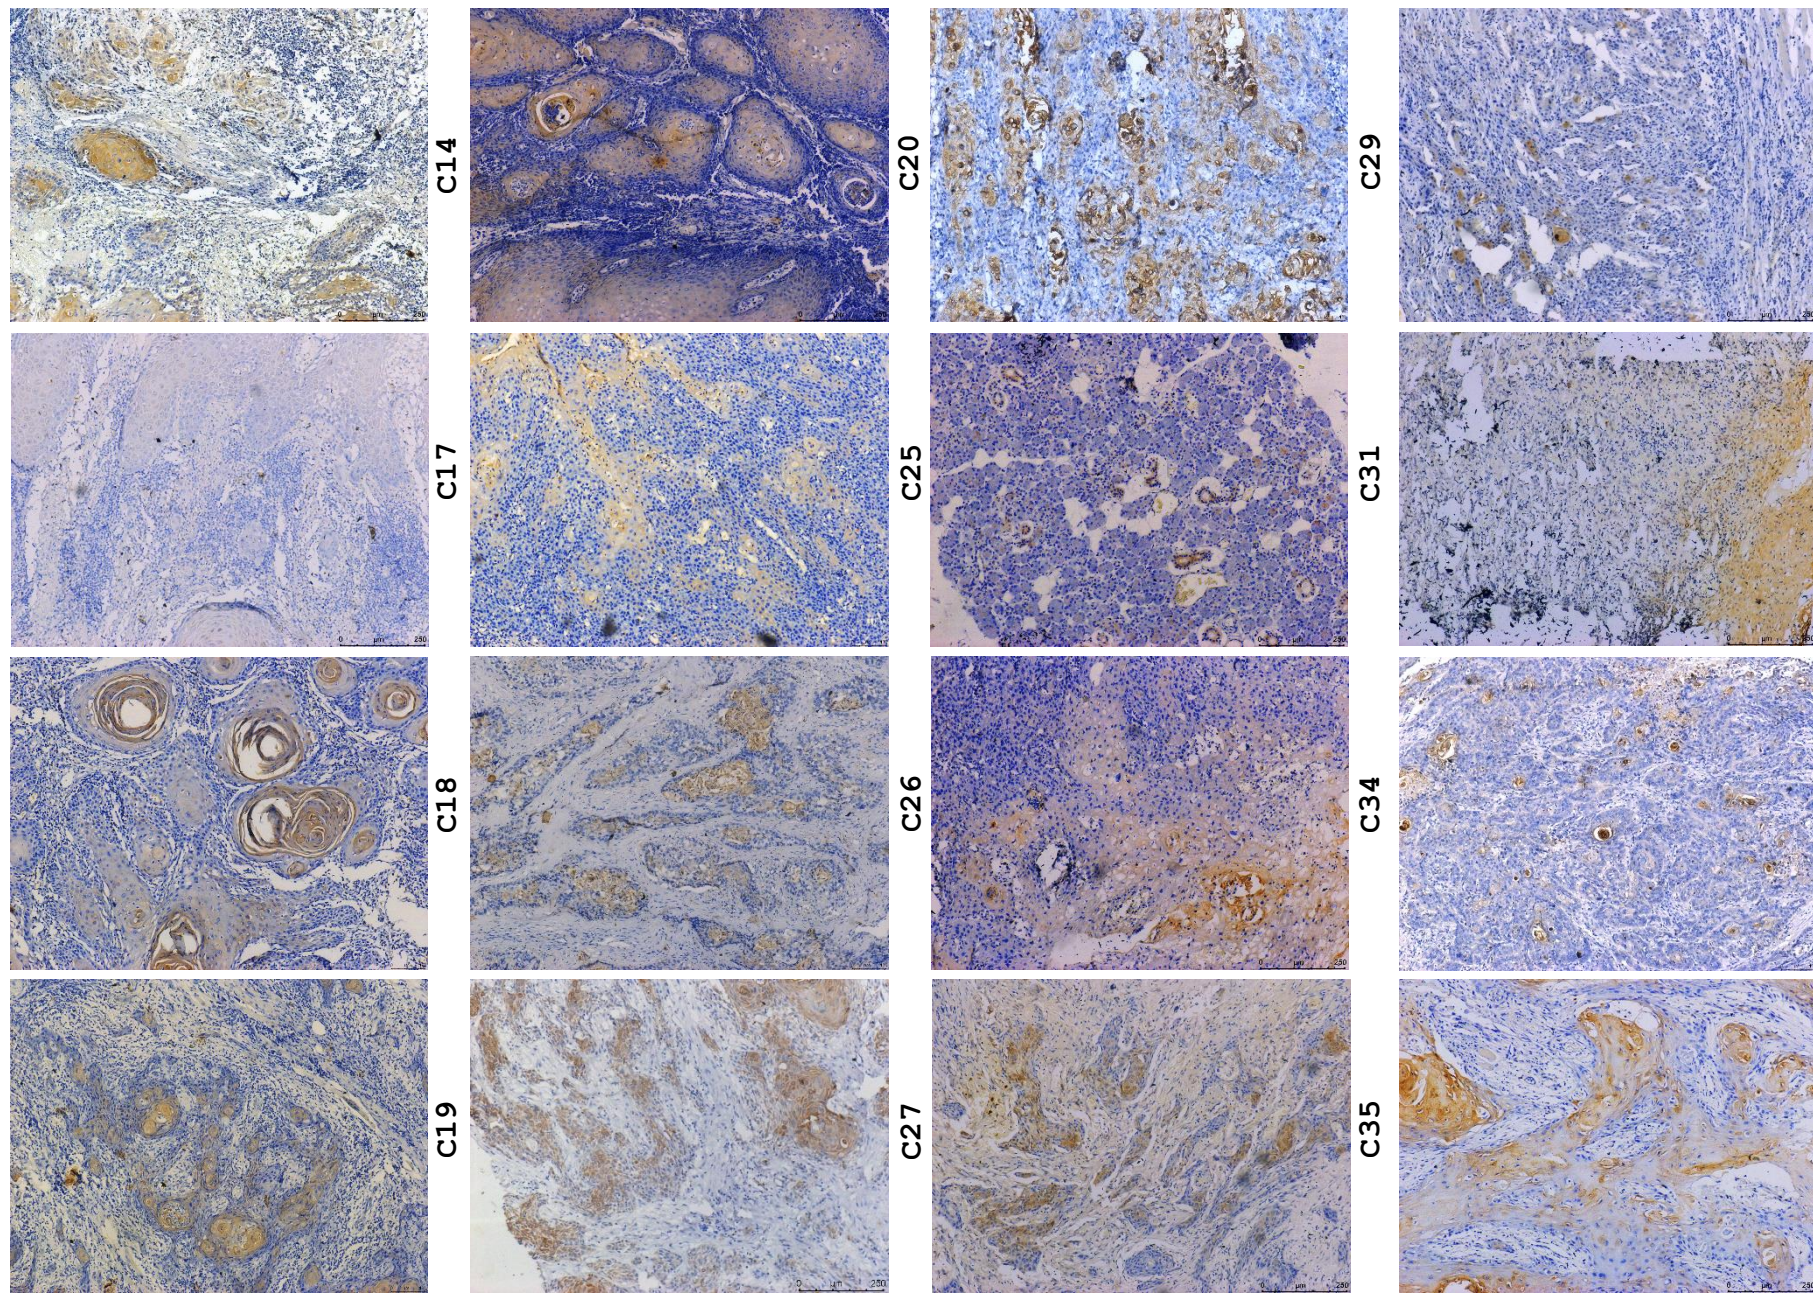

Supple Fig 3A: IHC staining with anti-L1ORF1p (Non-recurrent) (n=35)



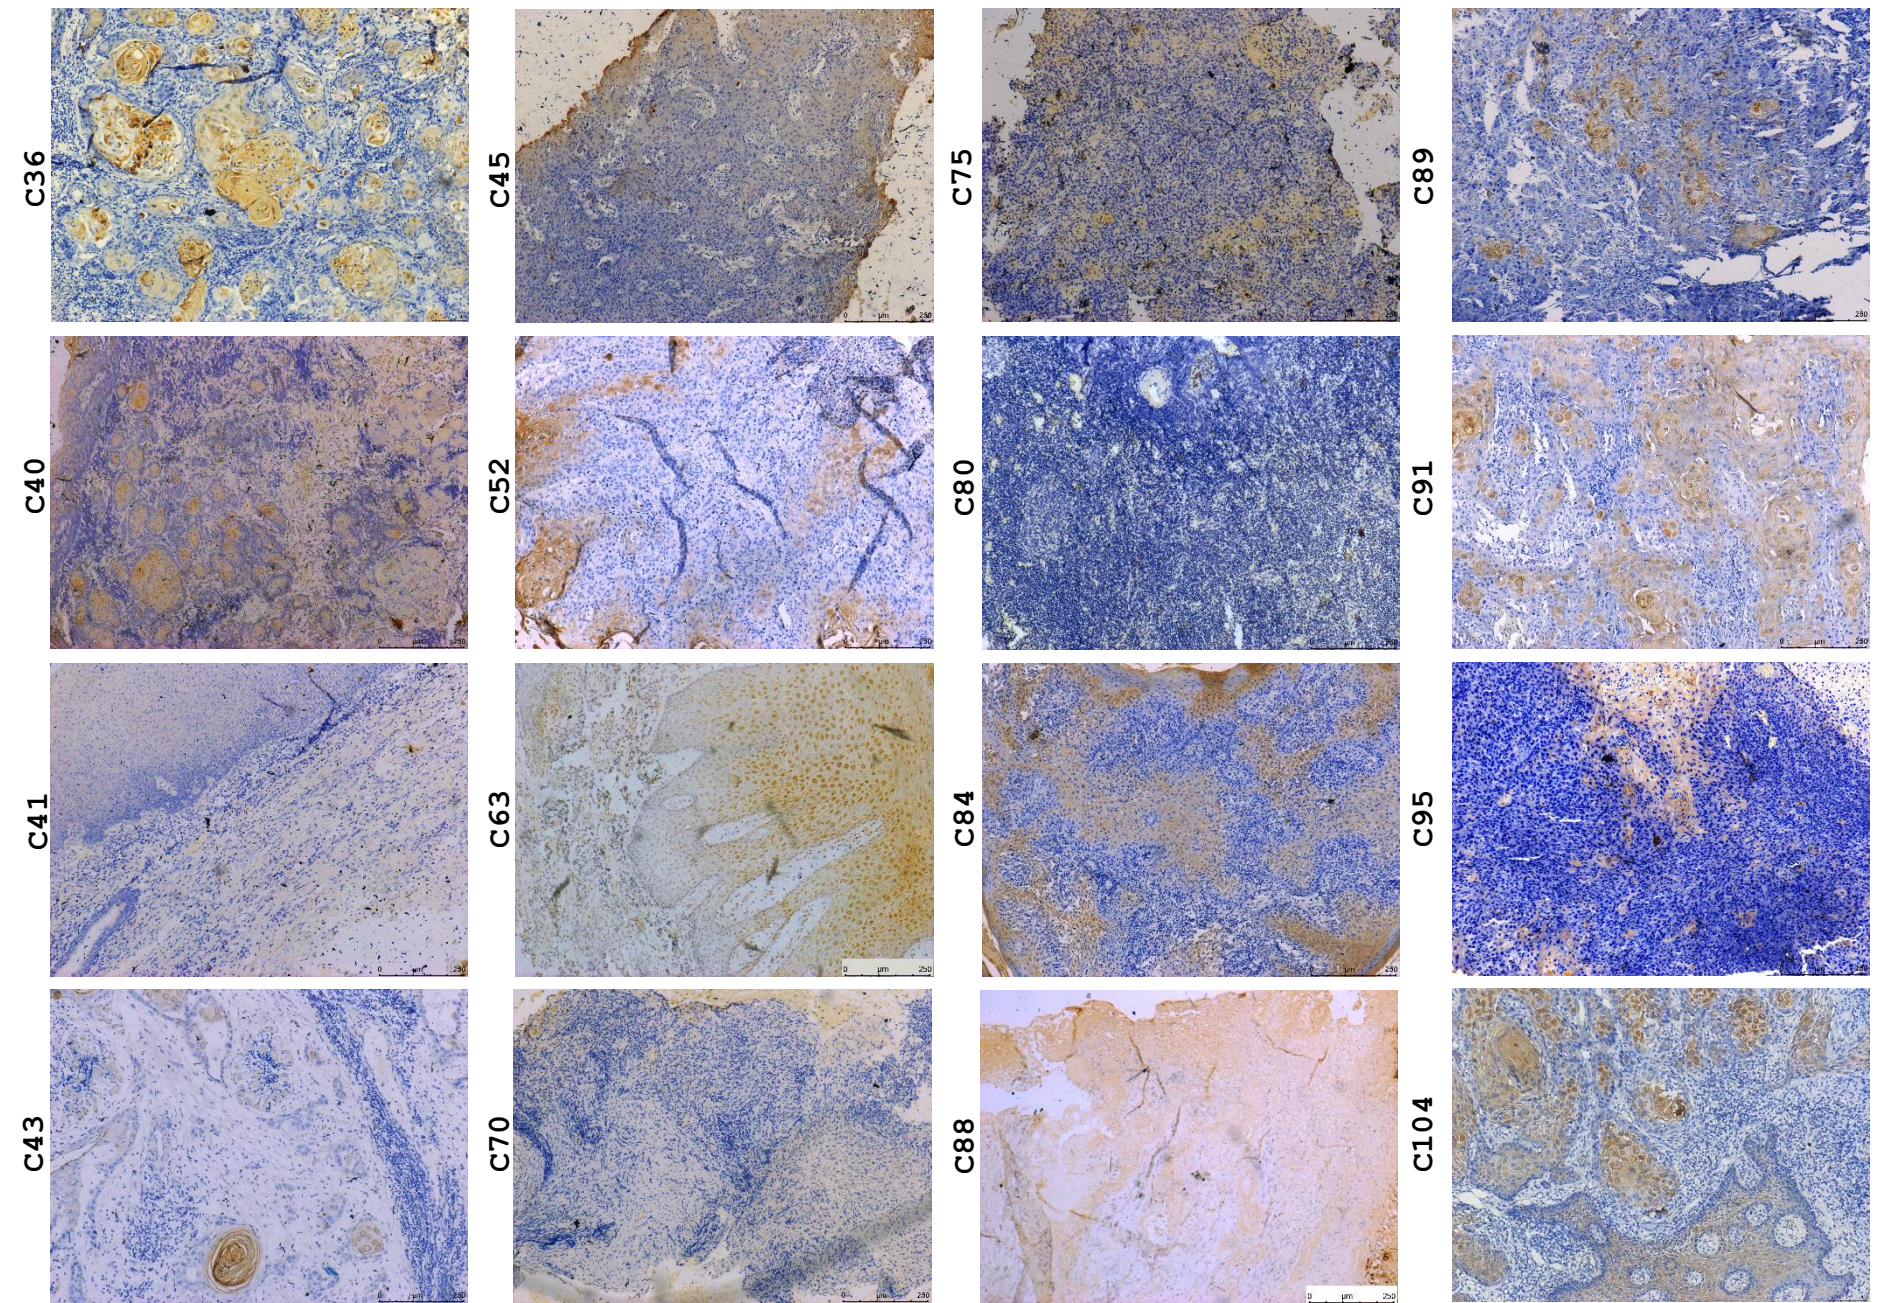

Supple Fig 3A: IHC staining with anti-L1ORF1p (Non-recurrent) (n=35)



C108

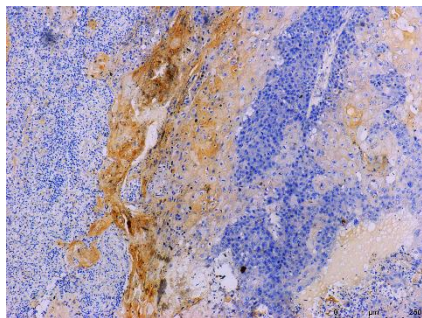

C111

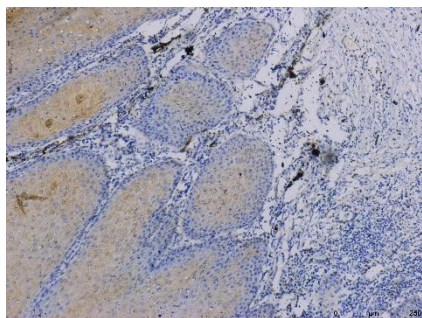

C114

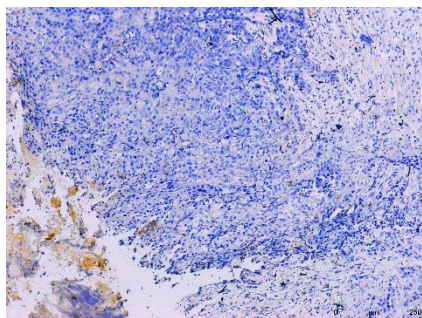

Supple Fig 3A: IHC staining with anti-L1ORF1p (Non-recurrent) (n=35)



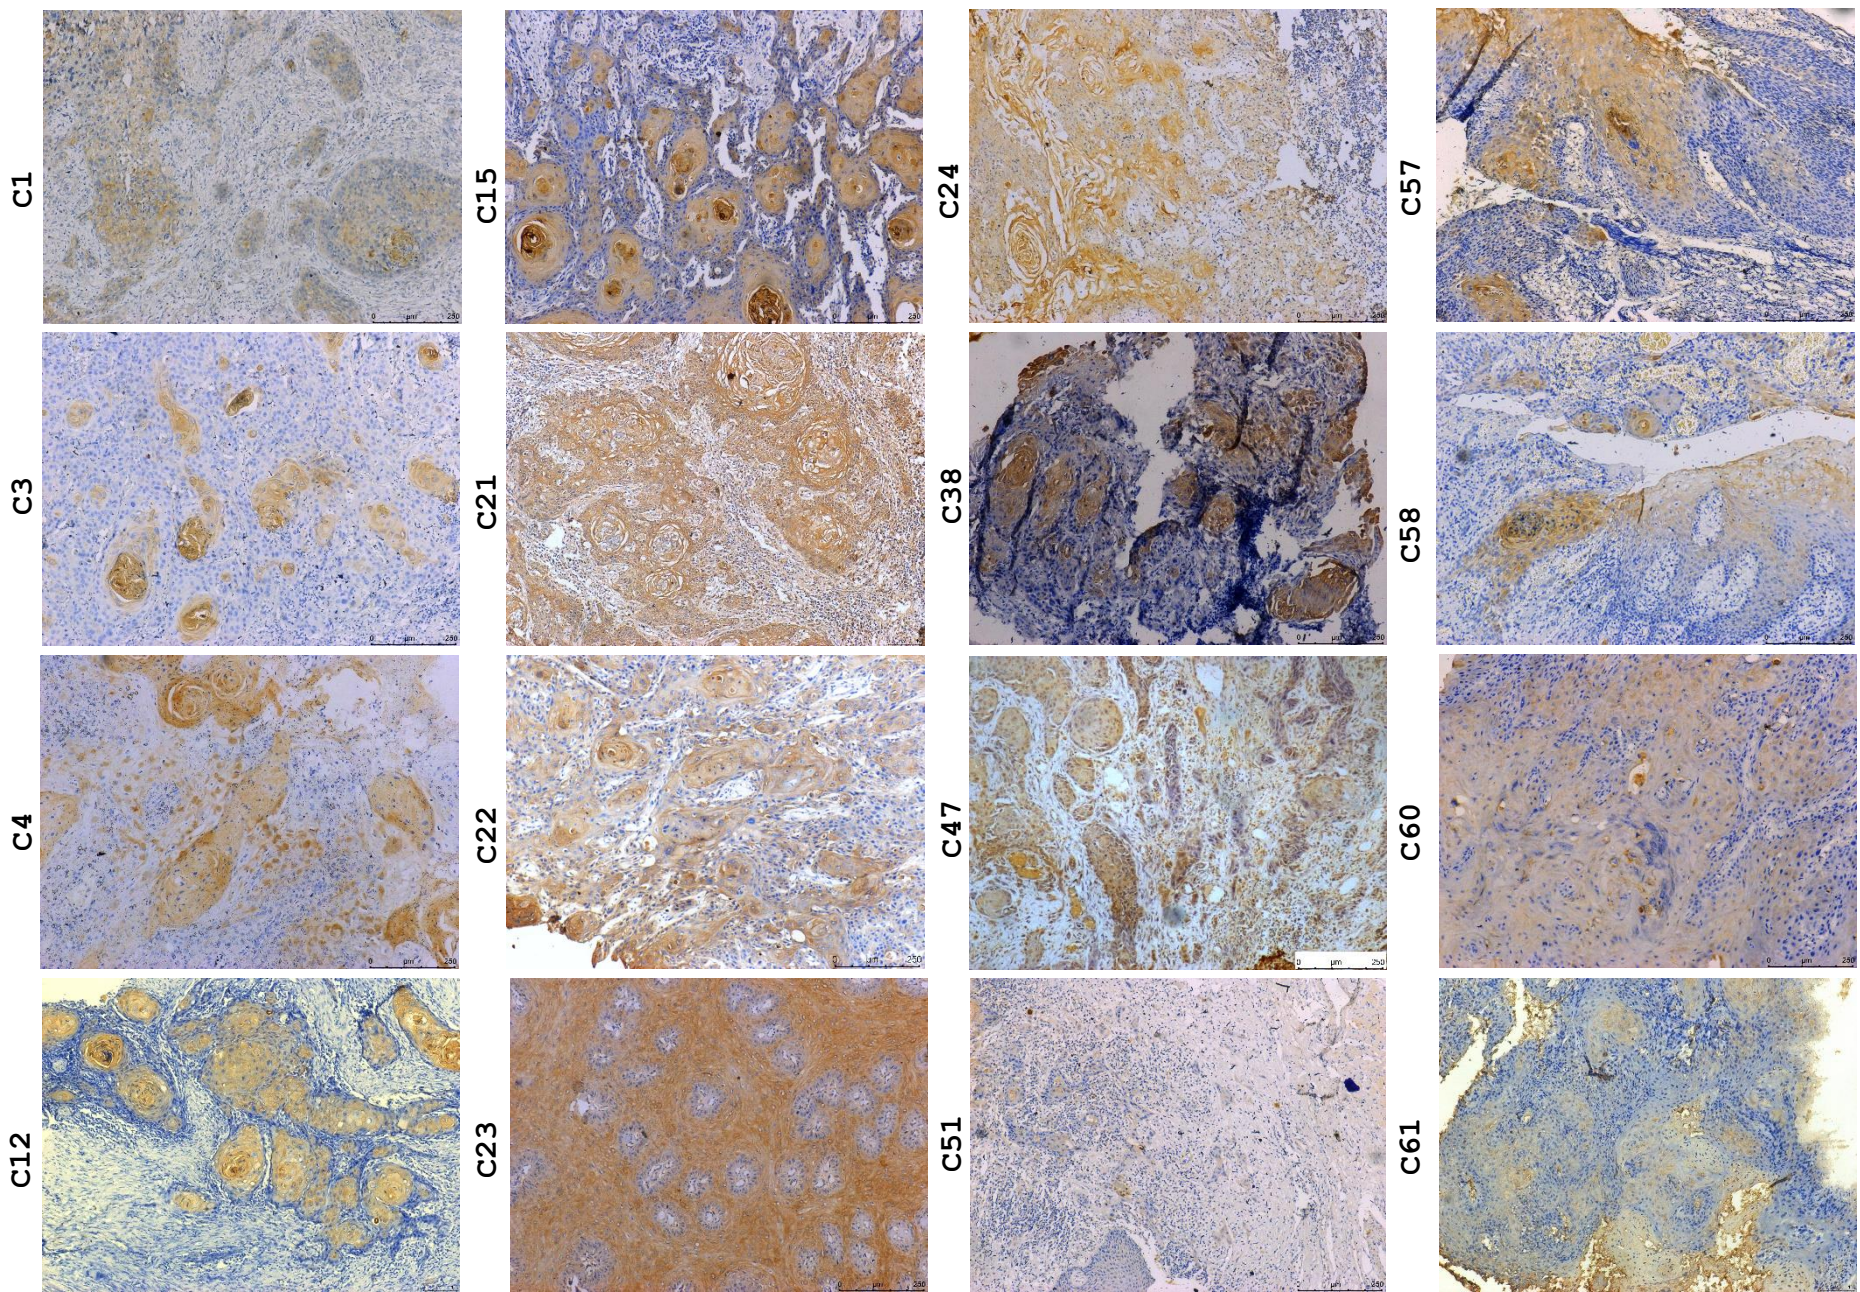

Supple Fig 3B: IHC staining with anti-L1ORF1p (Recurrent) (n=35)



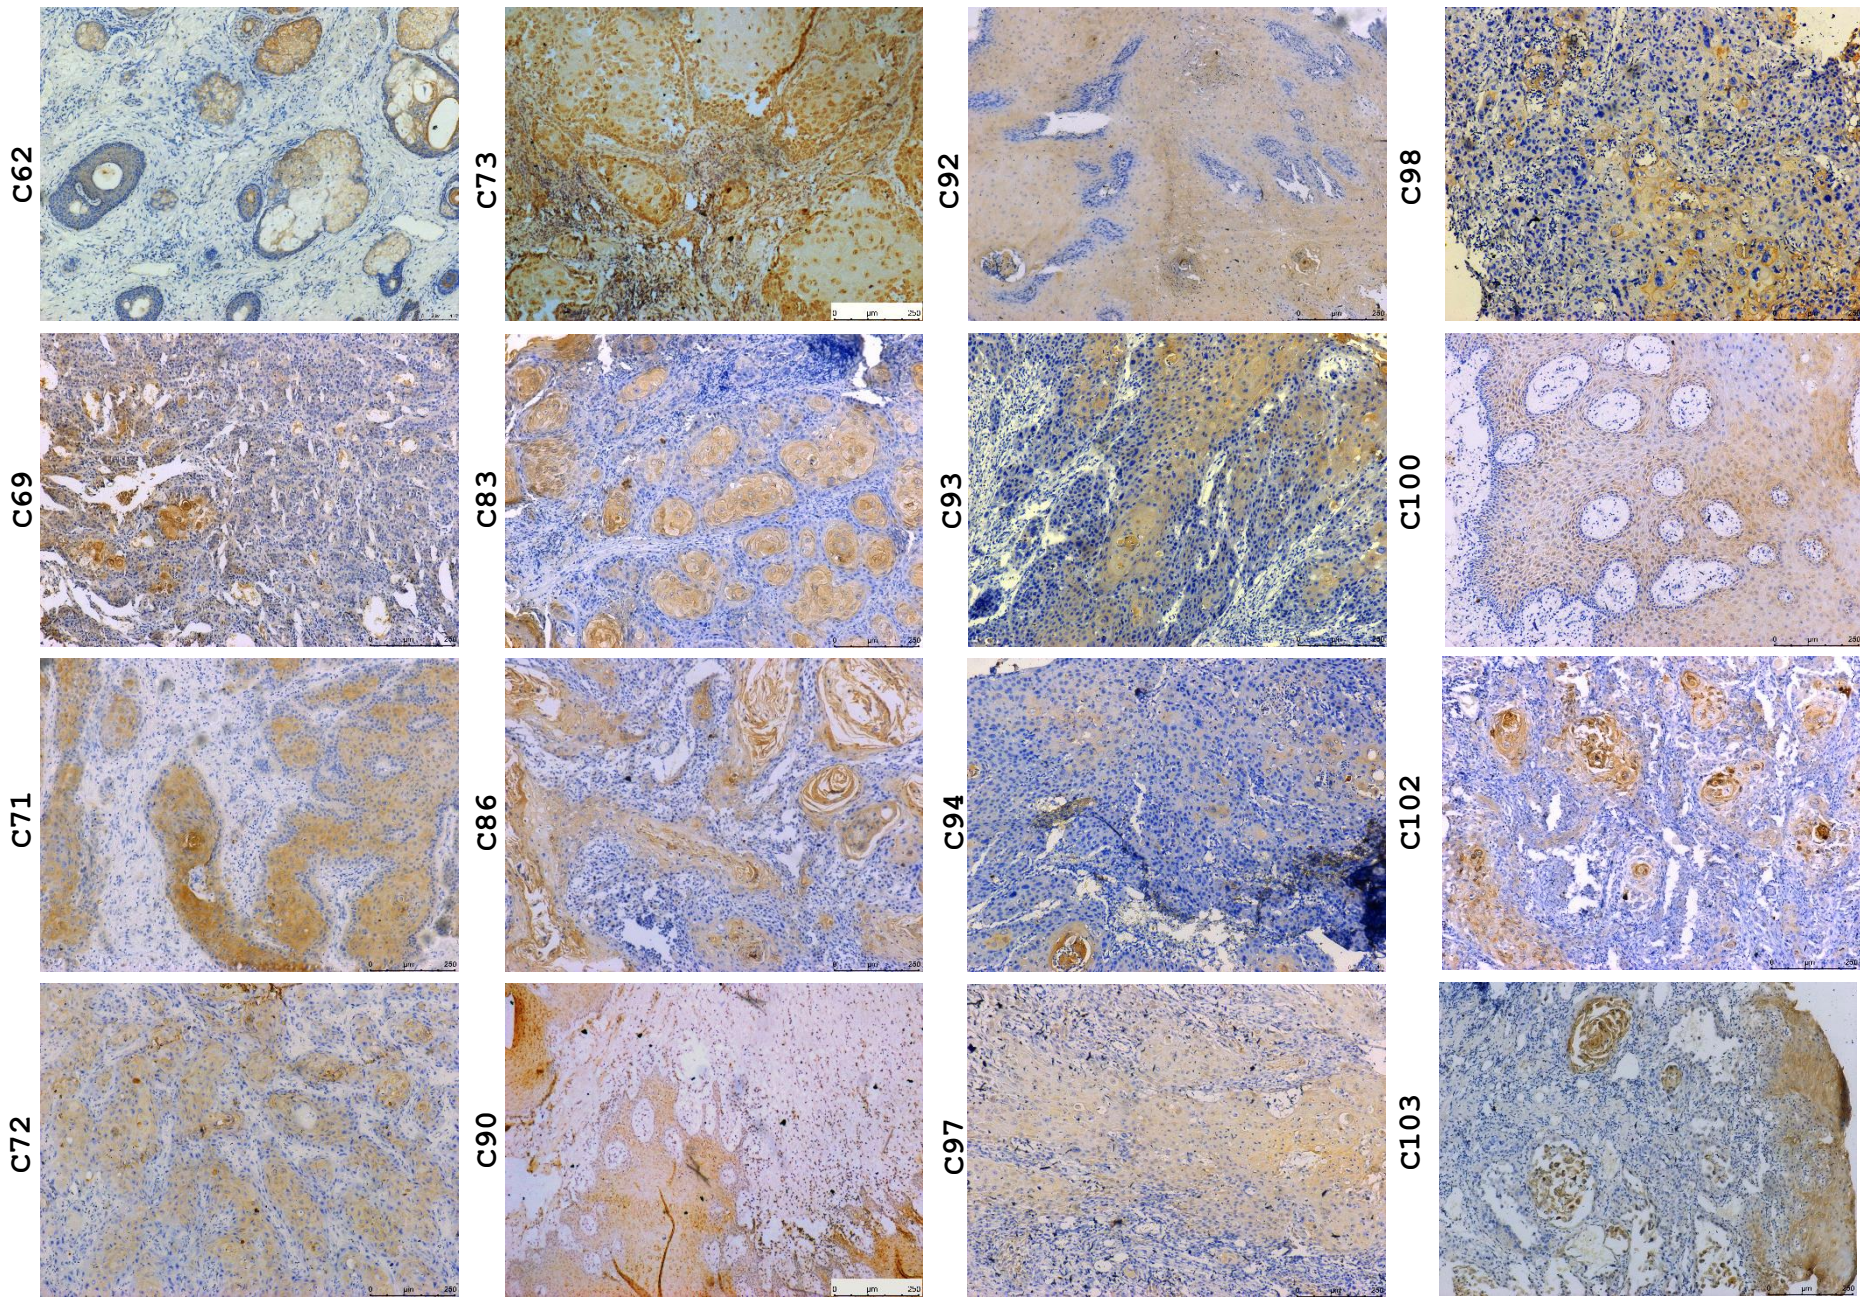

Supple Fig 3B: IHC staining with anti-L1ORF1p (Recurrent) (n=35)



C109

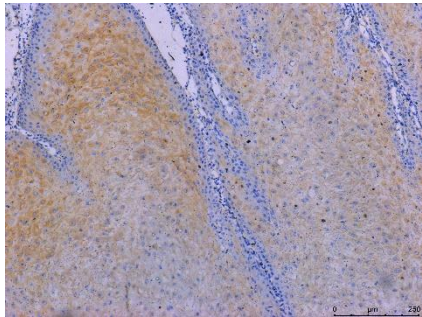

C112

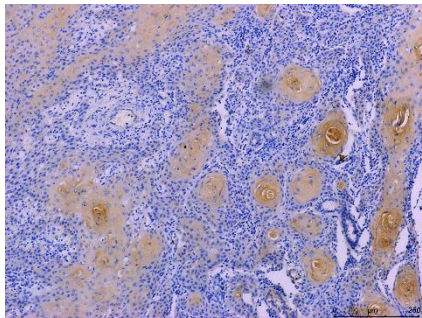

C113

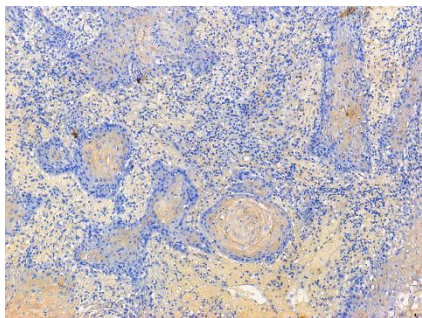

Supple Fig 3B: IHC staining with anti-L1ORF1p (Recurrent) (n=35)



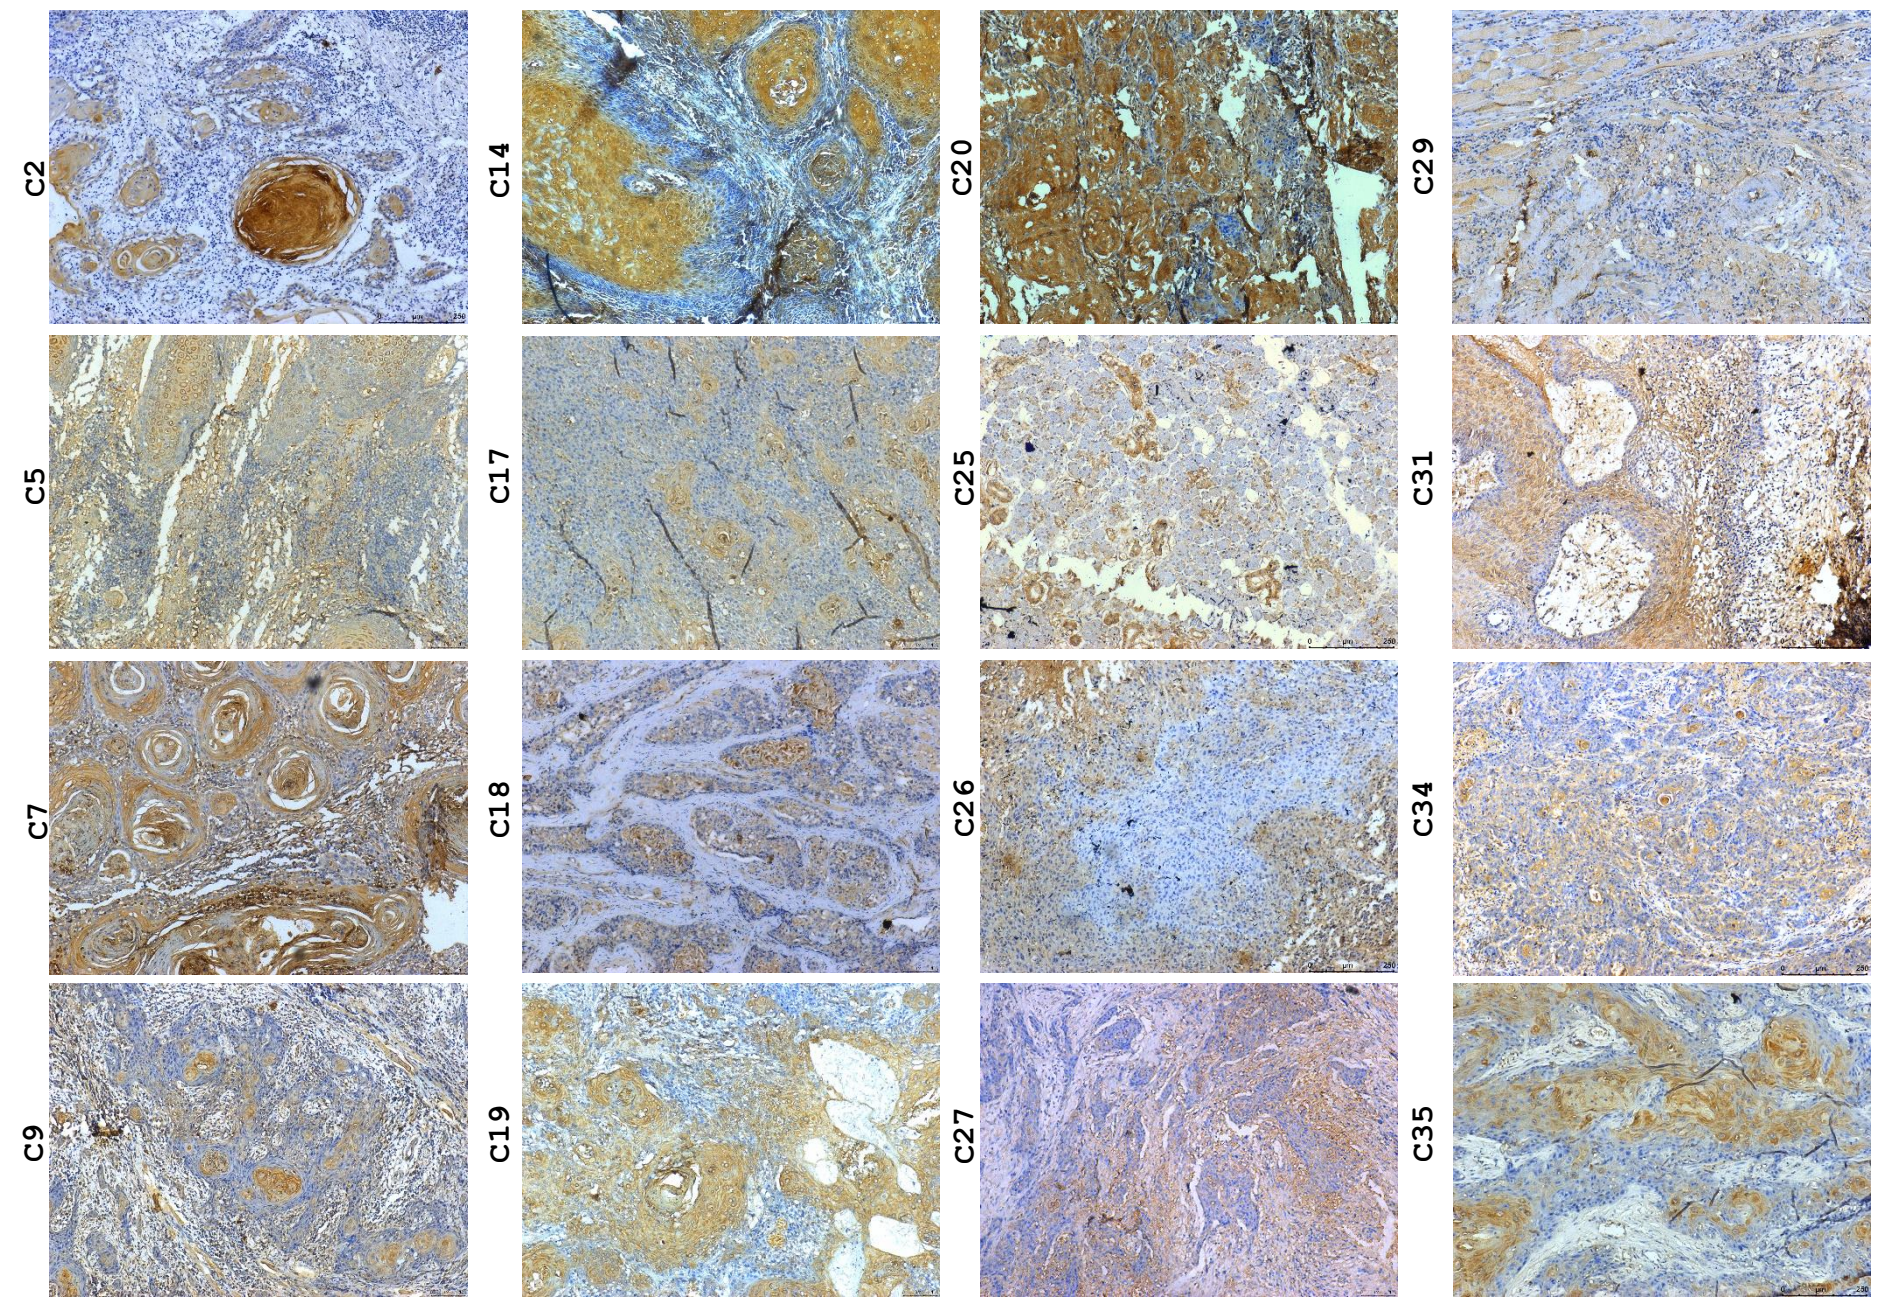

Supple Fig 3C: IHC staining with anti-L1ORF2p (Non-recurrent) (n=35)



C36

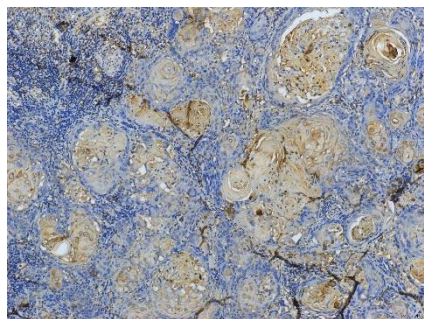

C45

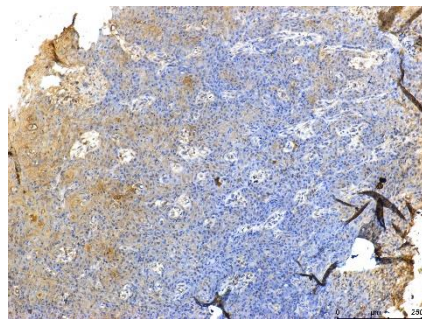

C75

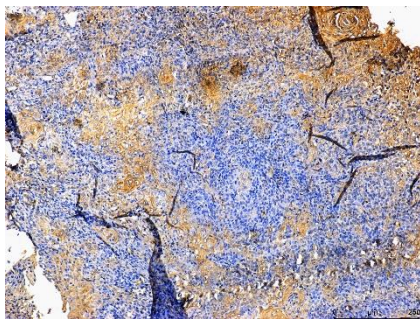

C89

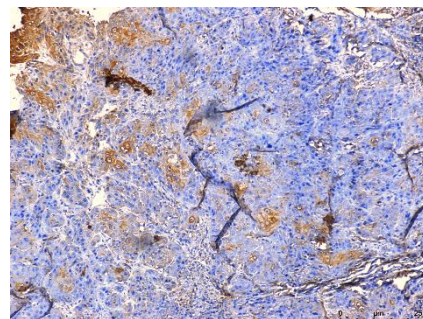

C40

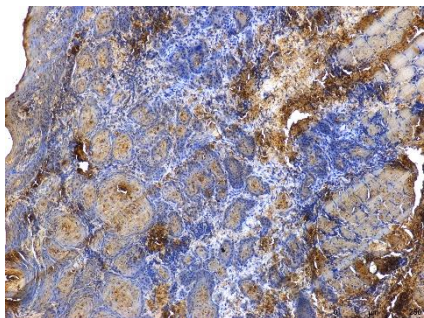

C52

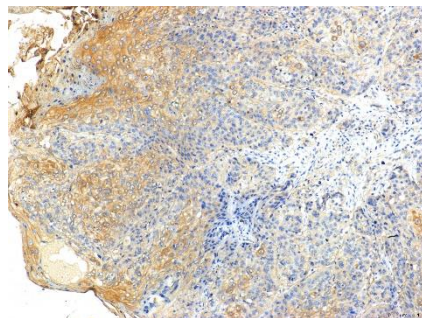

C80

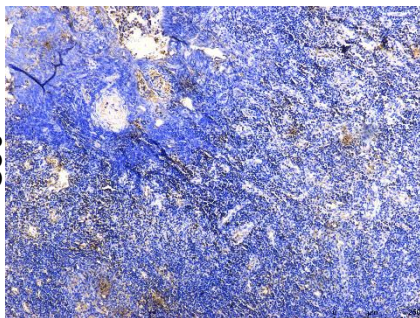

C91

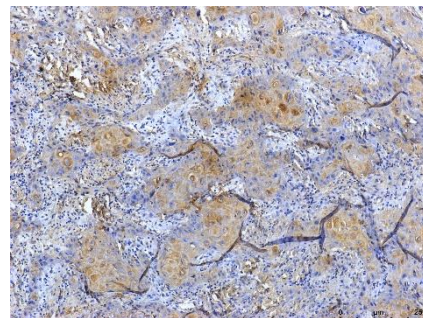

C41

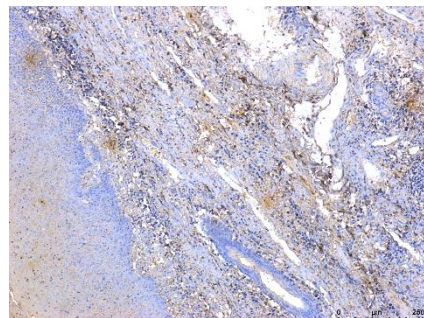

C63

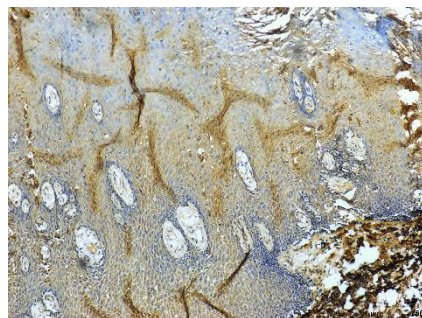

C84

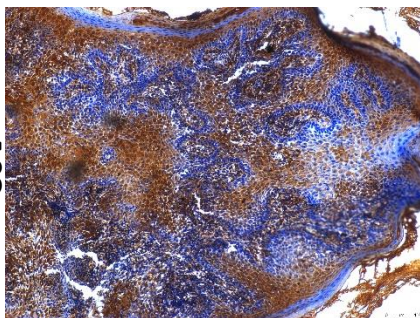

C95

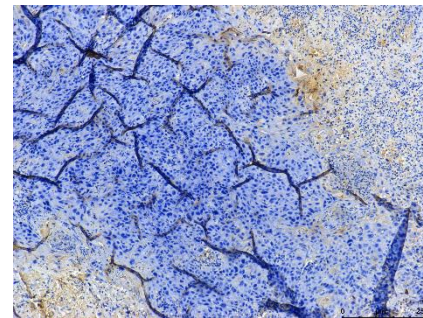

C43

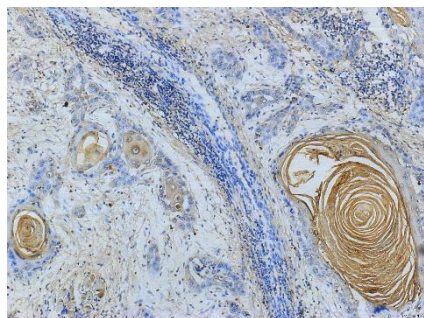

C70

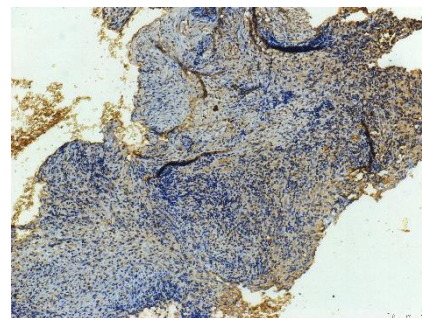

C88

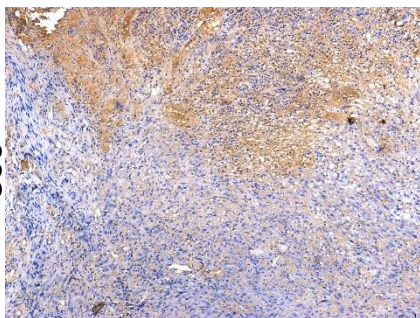

C104

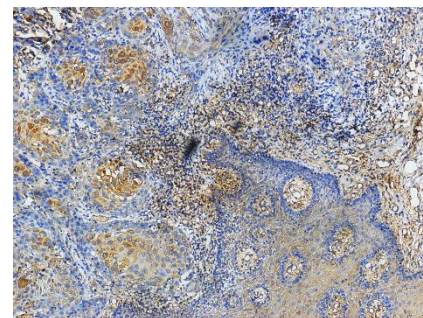

Supple Fig 3C: IHC staining with anti-L1ORF2p (Non-recurrent) (n=35)



C108

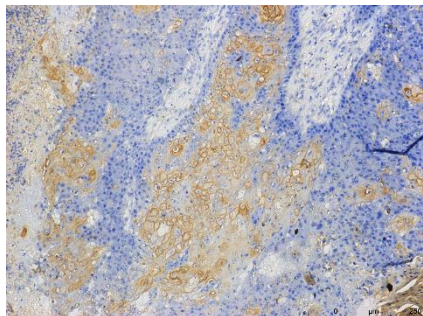

C111

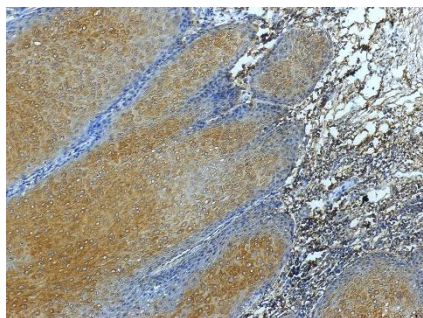

C114

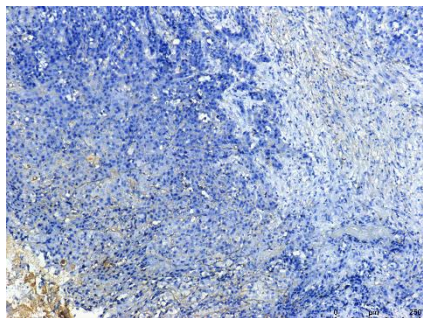

Supple Fig 3C: IHC staining with anti-L1ORF2p (Non-recurrent) (n=35)



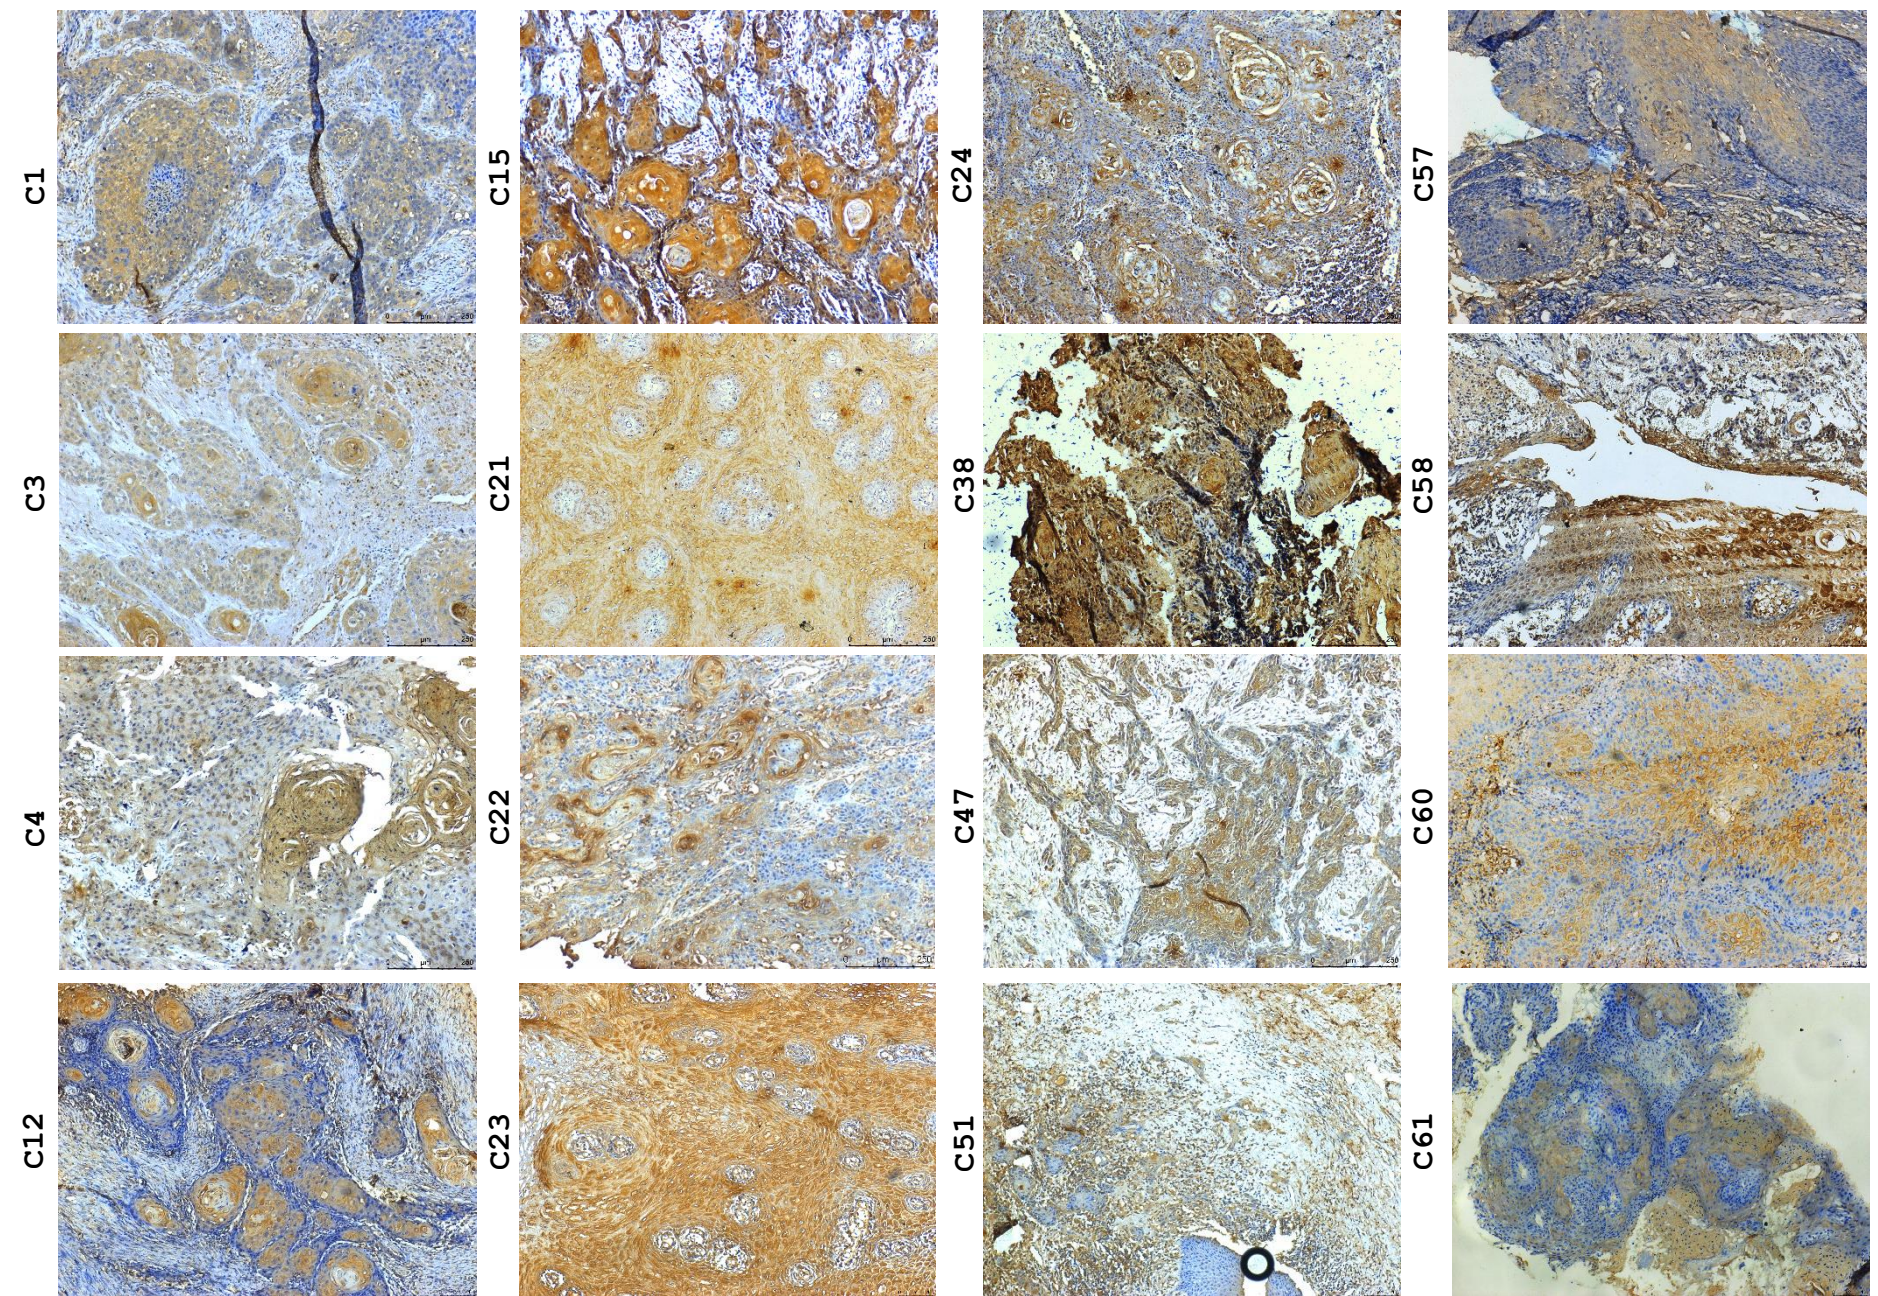

Supple Fig 3D: IHC staining with anti-L1ORF2p (Non-recurrent) (n=35)



C62

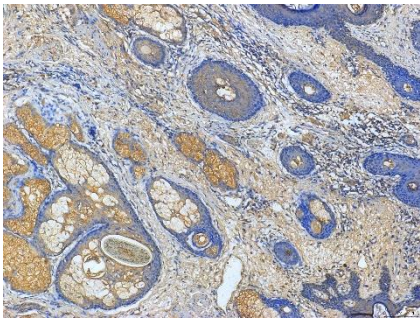

C73

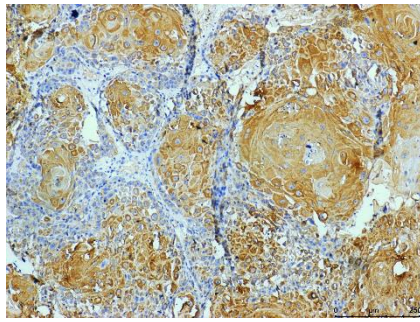

C92

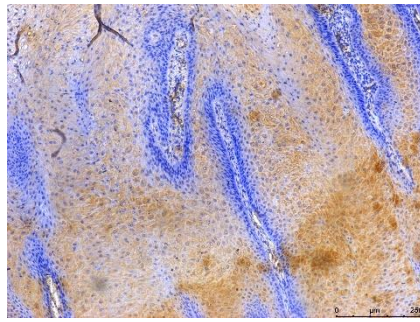

C98

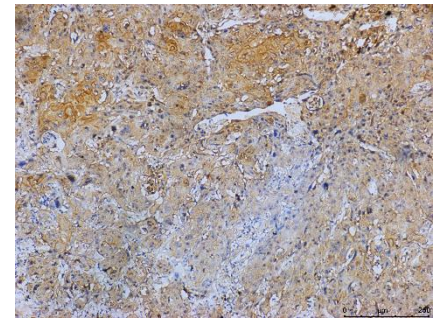

C69

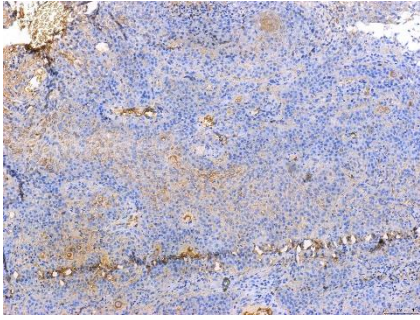

C83

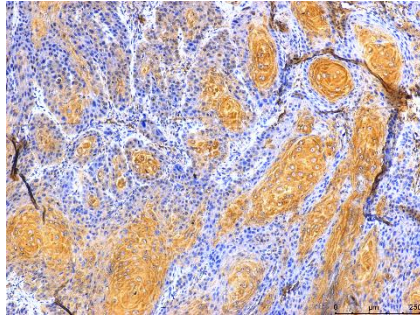

C93

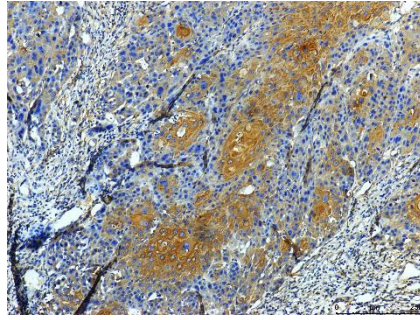

C100

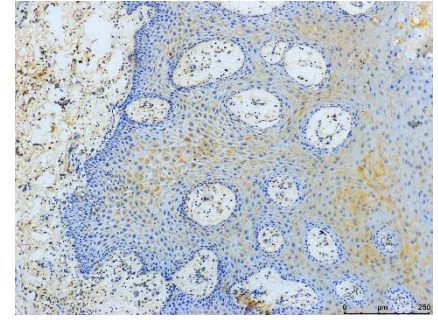

C71

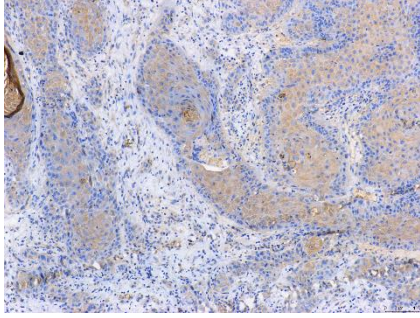

C86

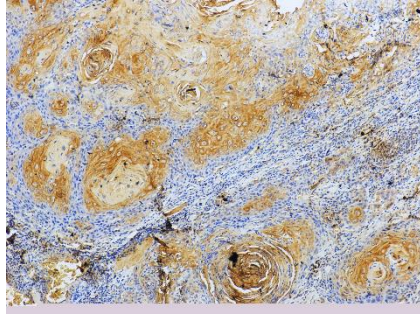

C94

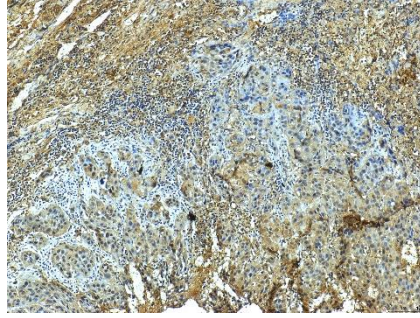

C102

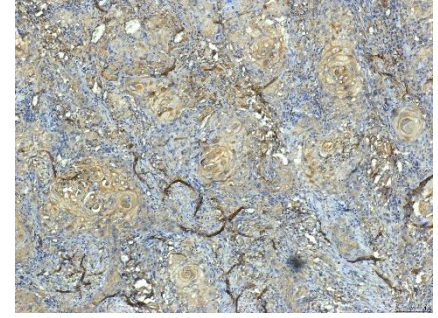

C72

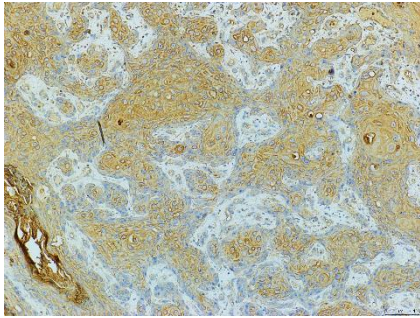

C90

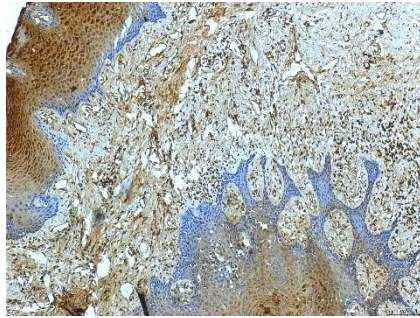

C97

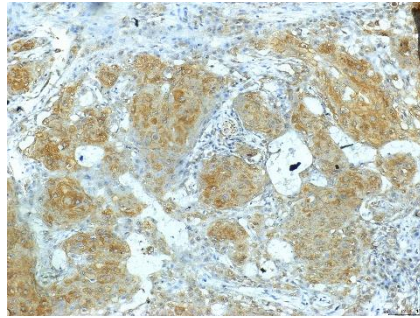

C103

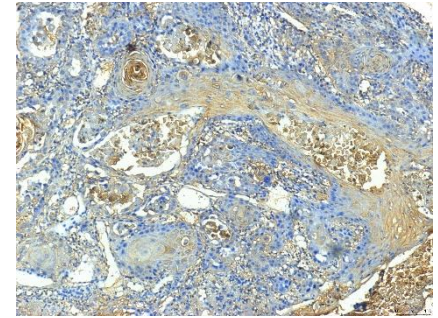

Supple Fig 3D: IHC staining with anti-L1ORF2p (Non-recurrent) (n=35)



C109

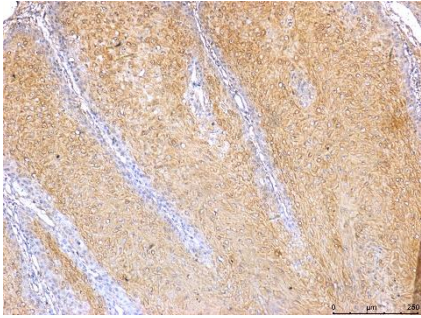

C112

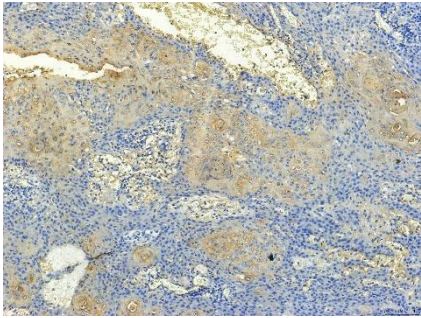

C113

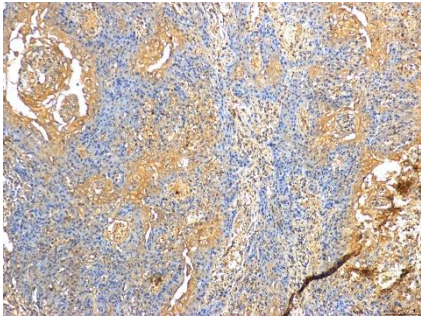

Supple Fig 3D: IHC staining with anti-L1ORF2p (Non-recurrent) (n=35)



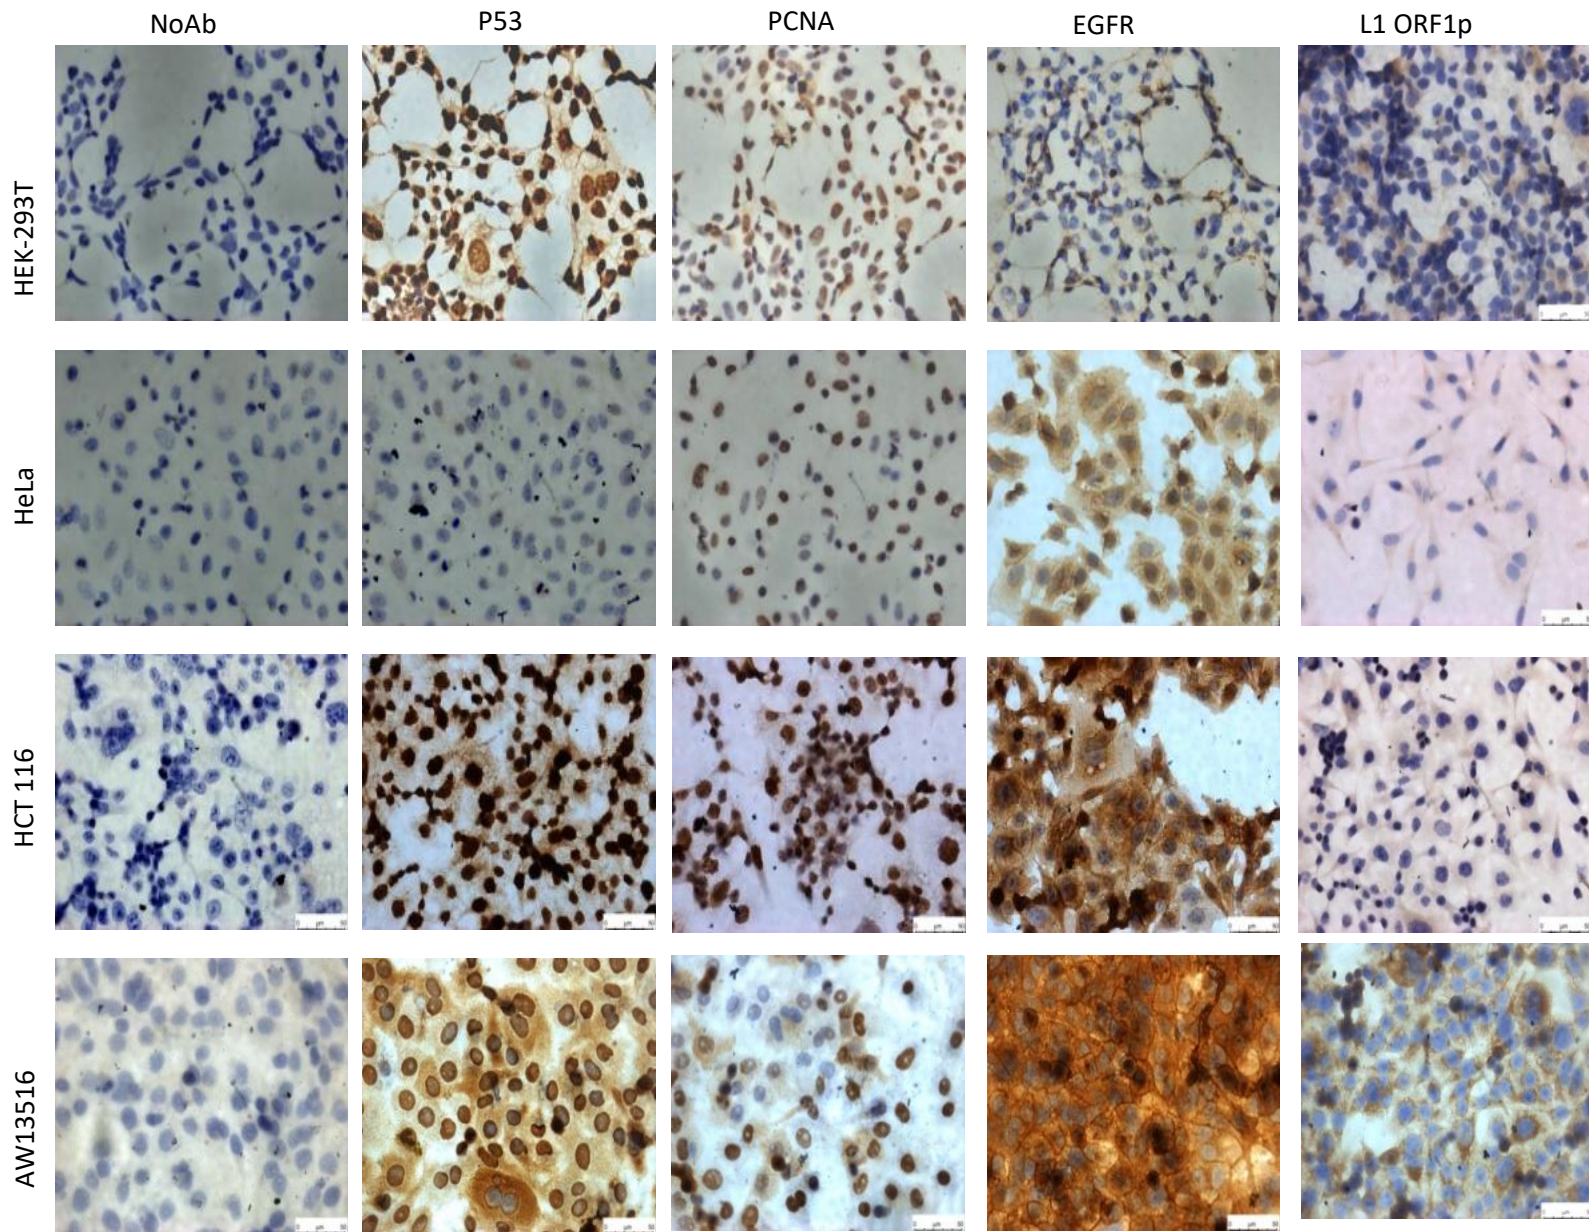

Supple Fig 4: L1ORF1p expression in established oral cancer cell line



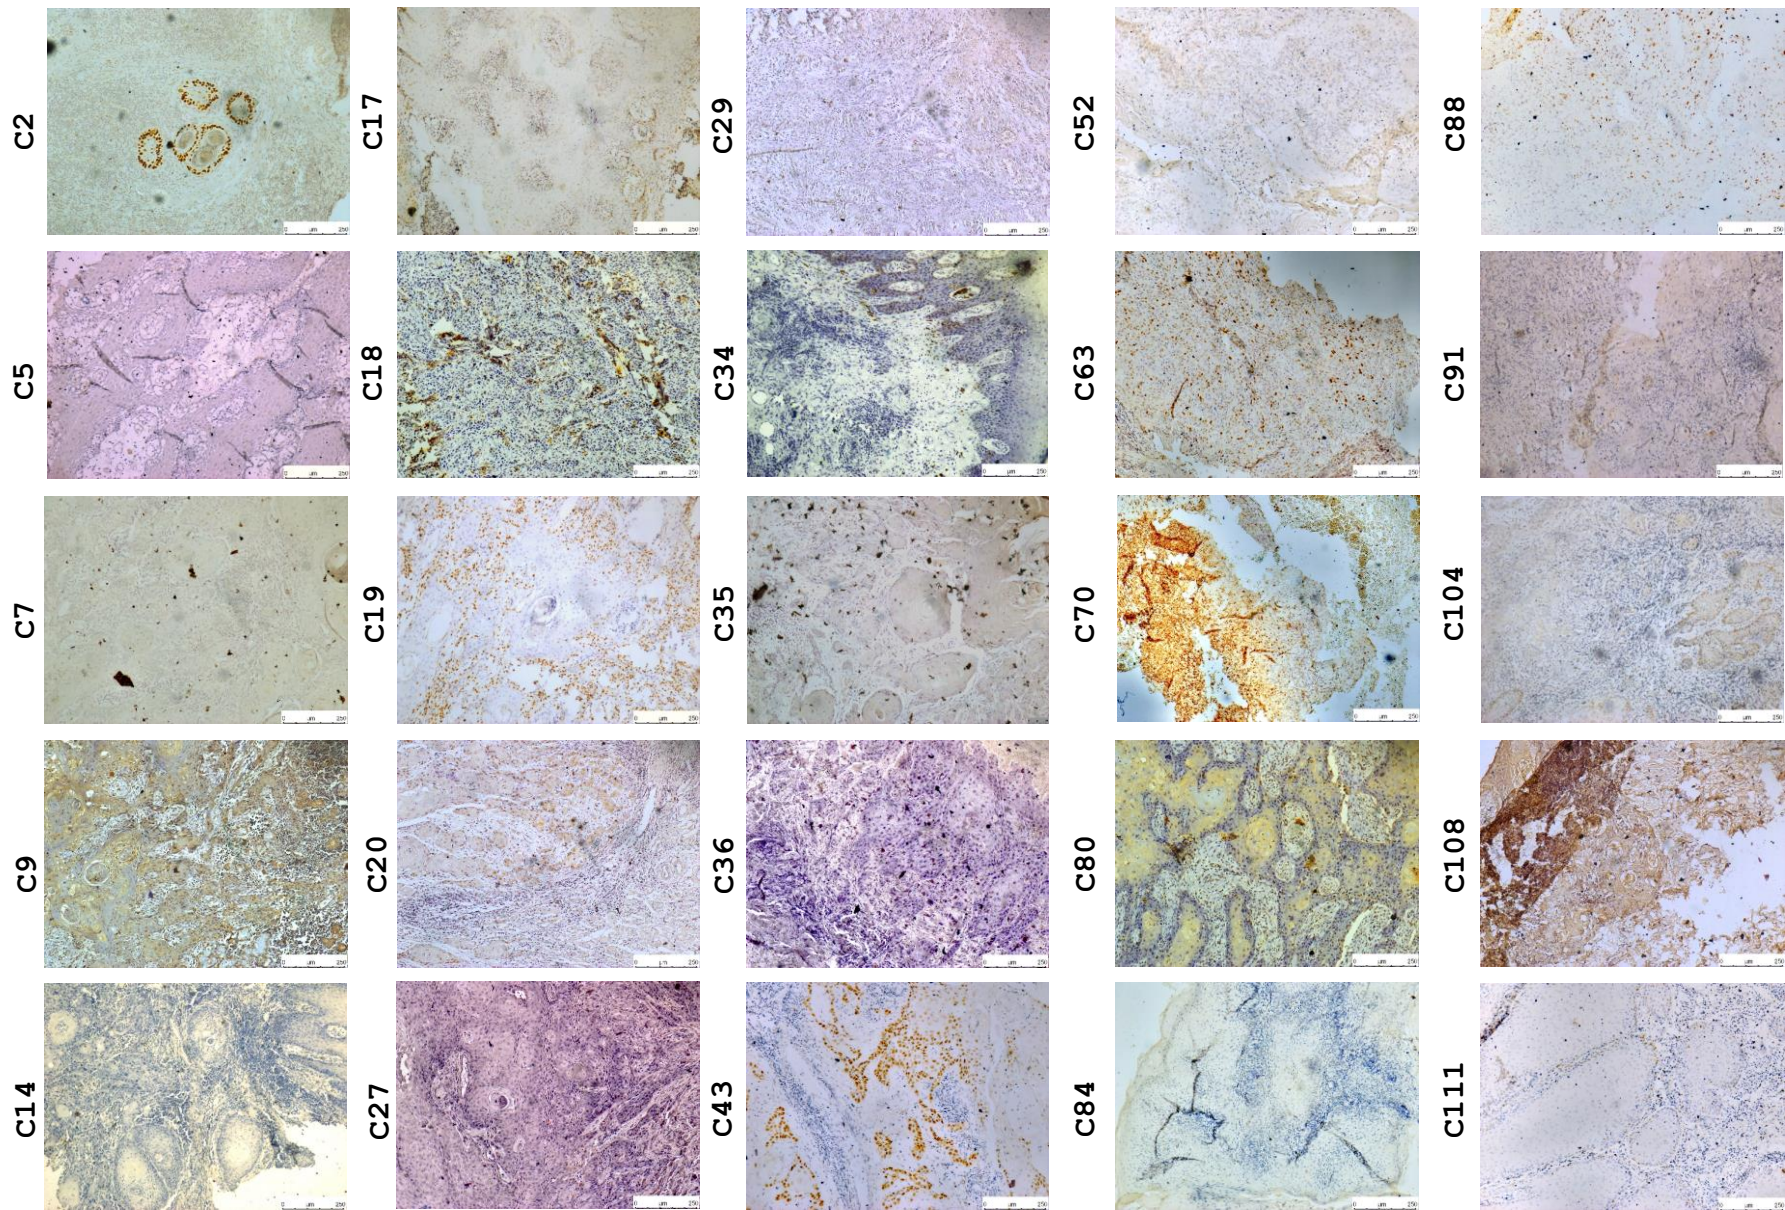



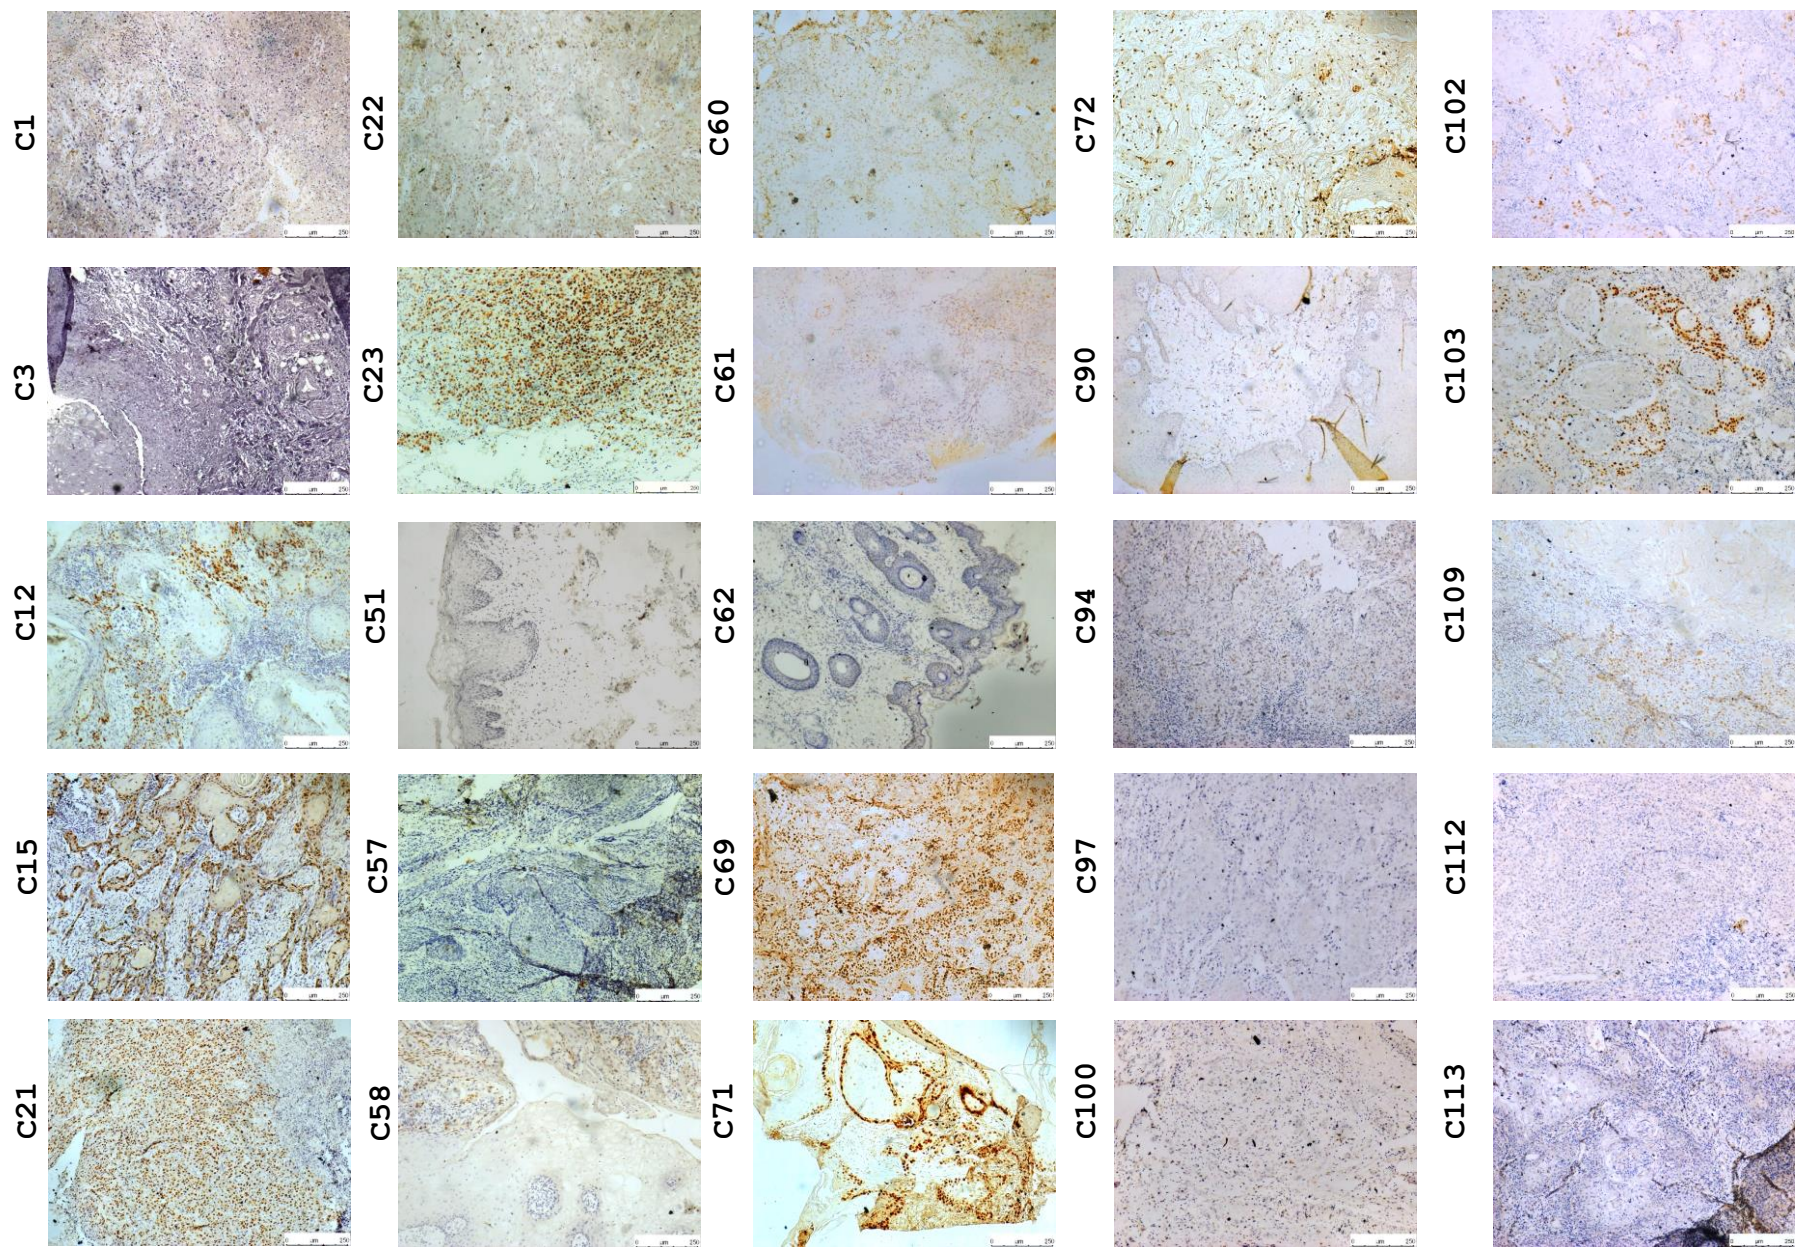

Supple Fig 5B: IHC staining with anti-P53 (Recurrent) ( n=25)



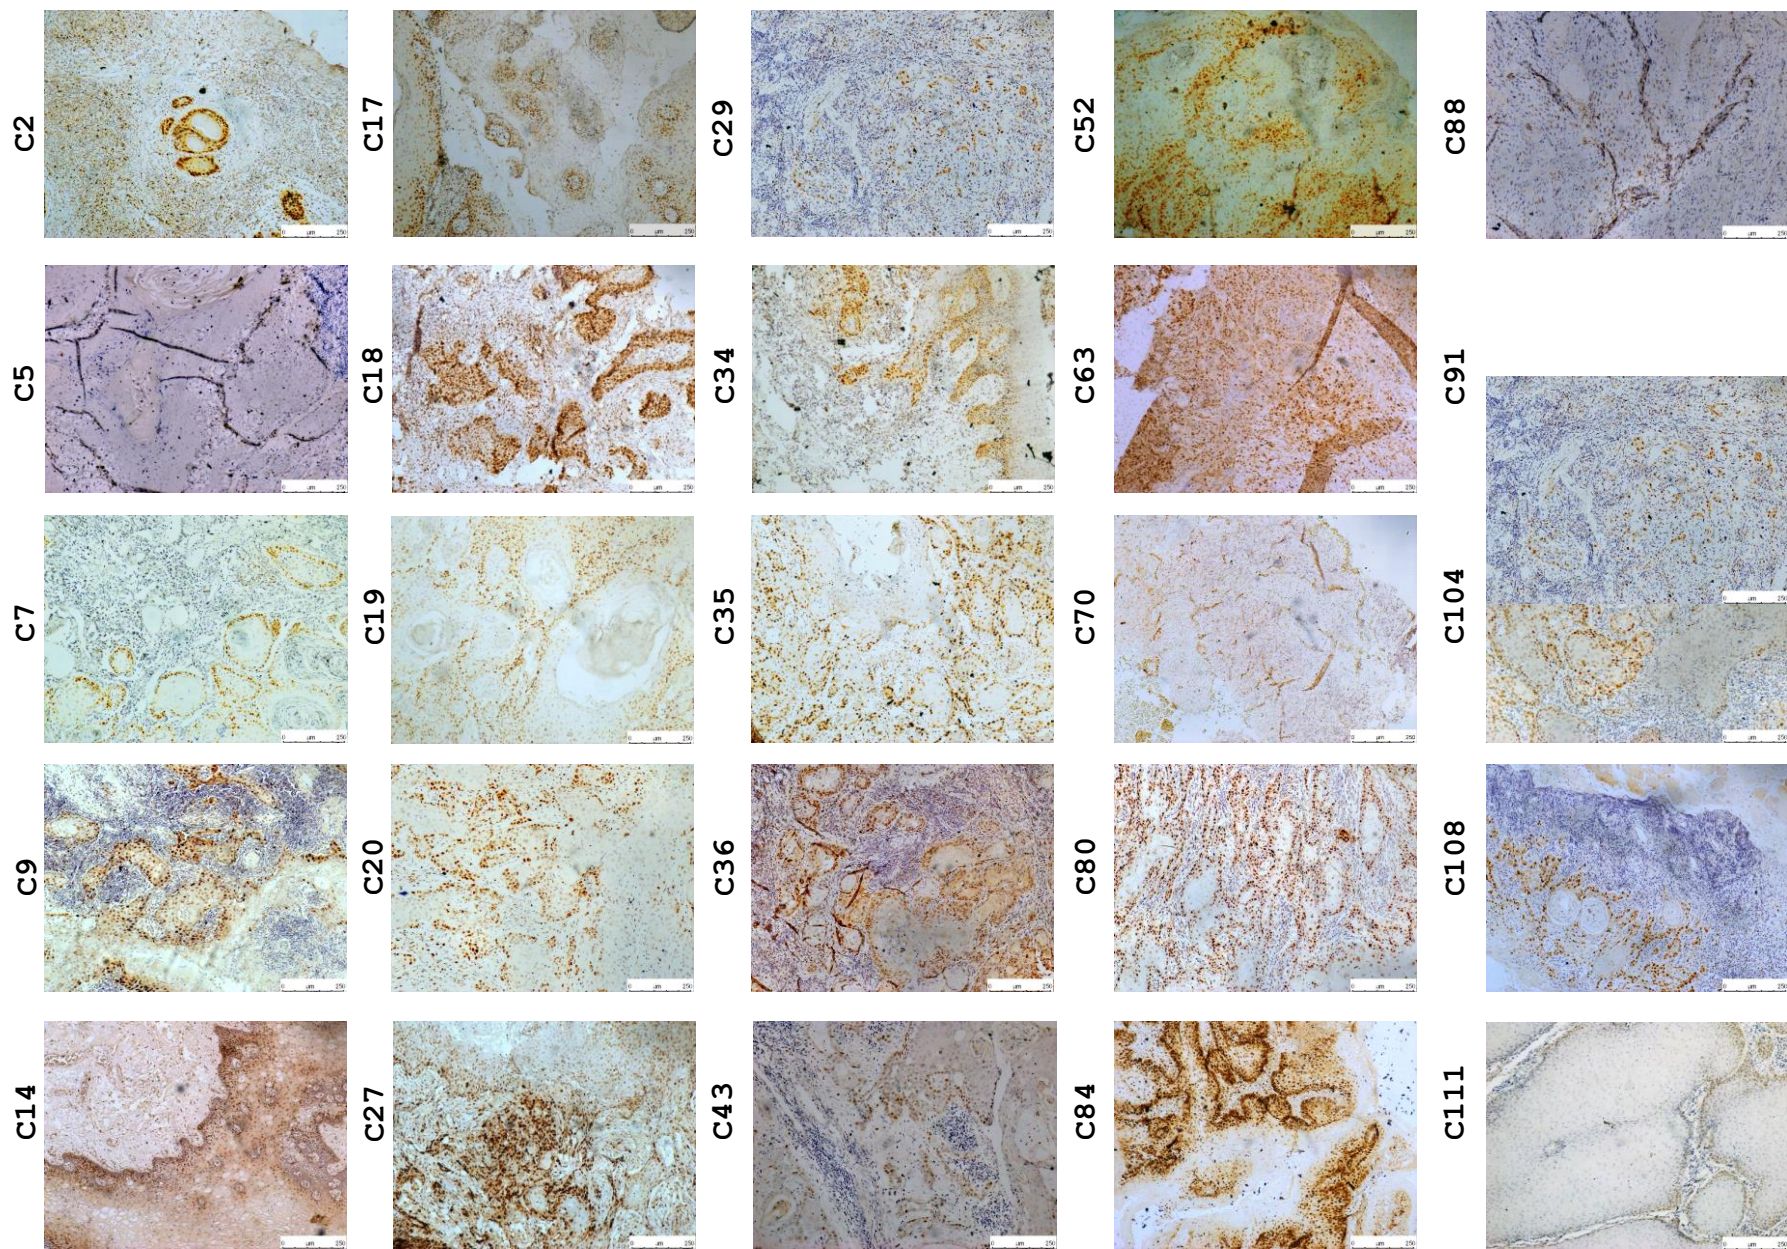

Supple Fig 6A: IHC staining with anti-PCNA (Non-recurrent) ( n=25)



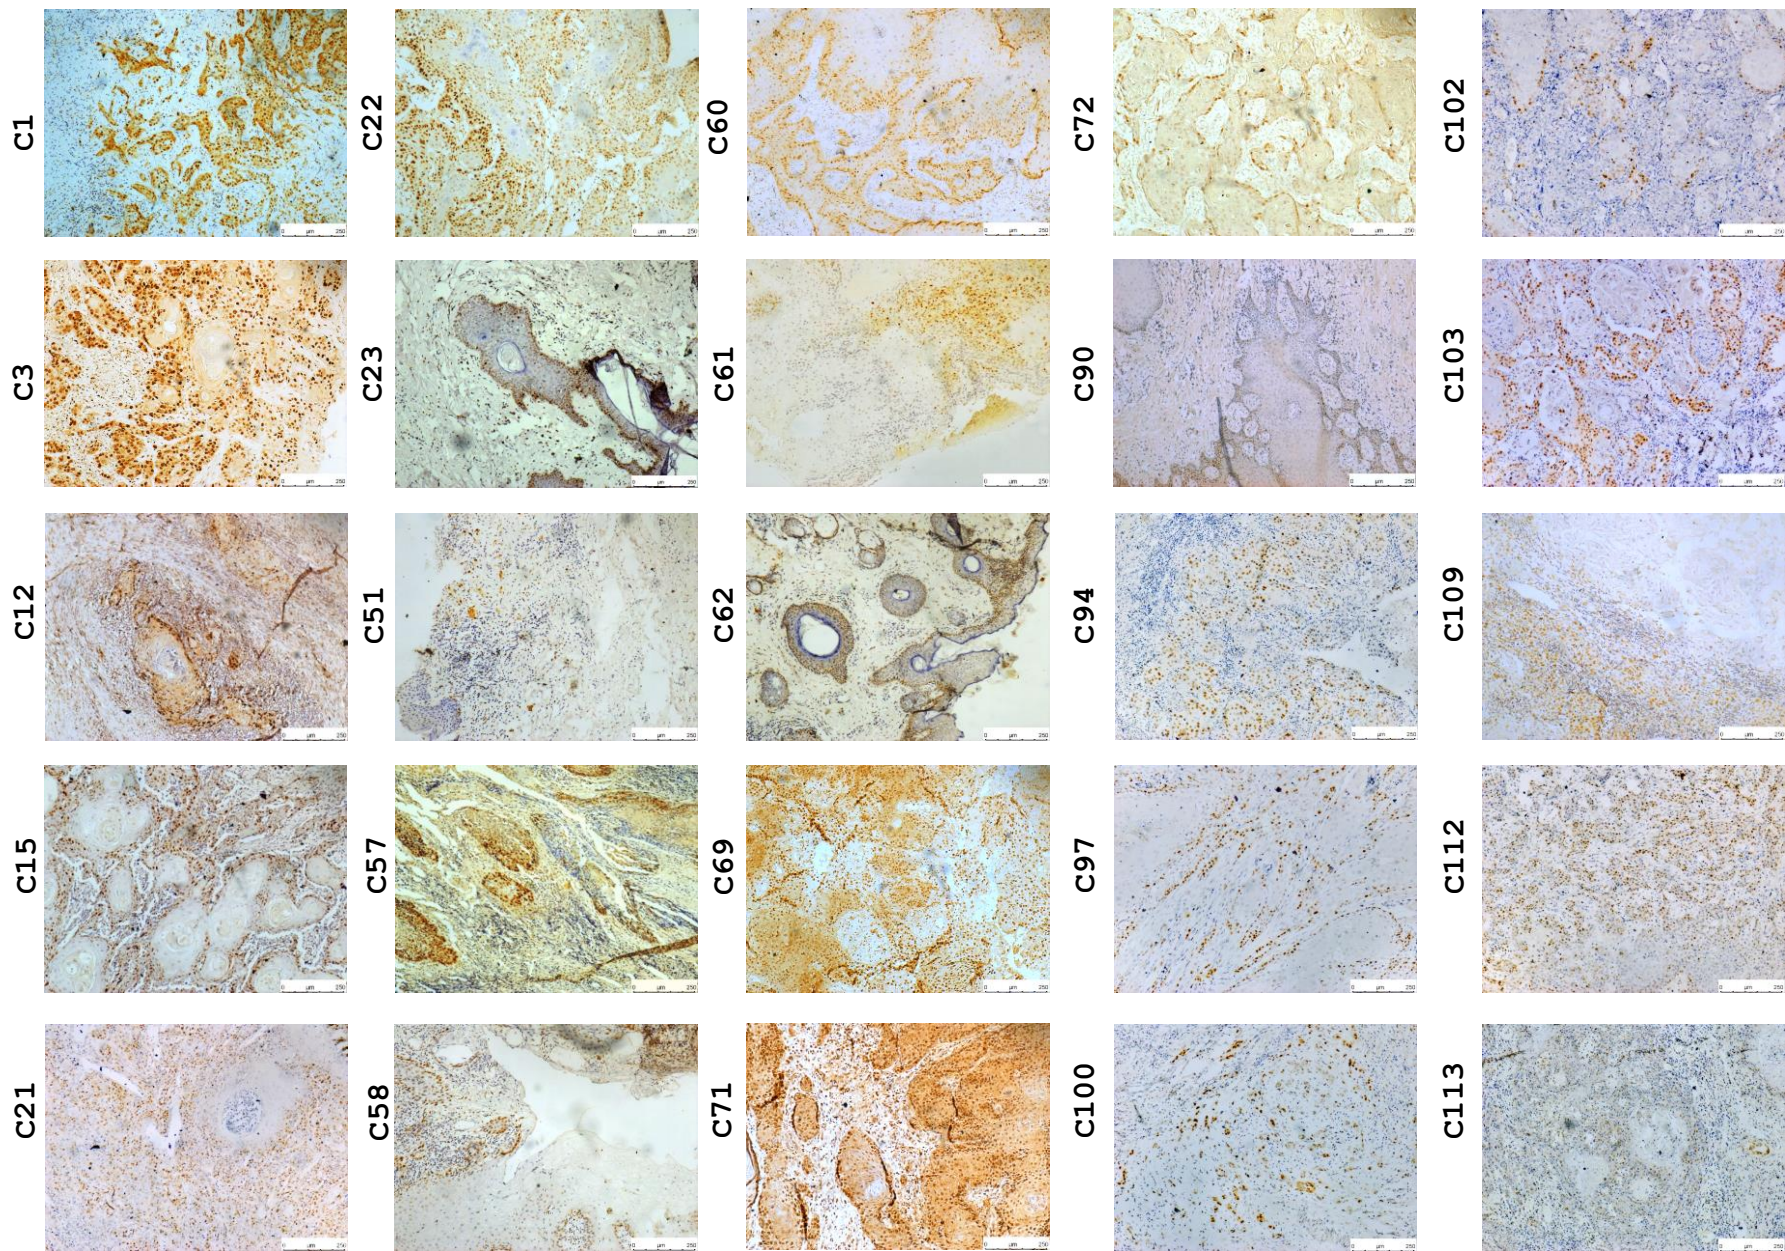

Supple Fig 6B: IHC staining with anti-PCNA (Recurrent) ( n=25)



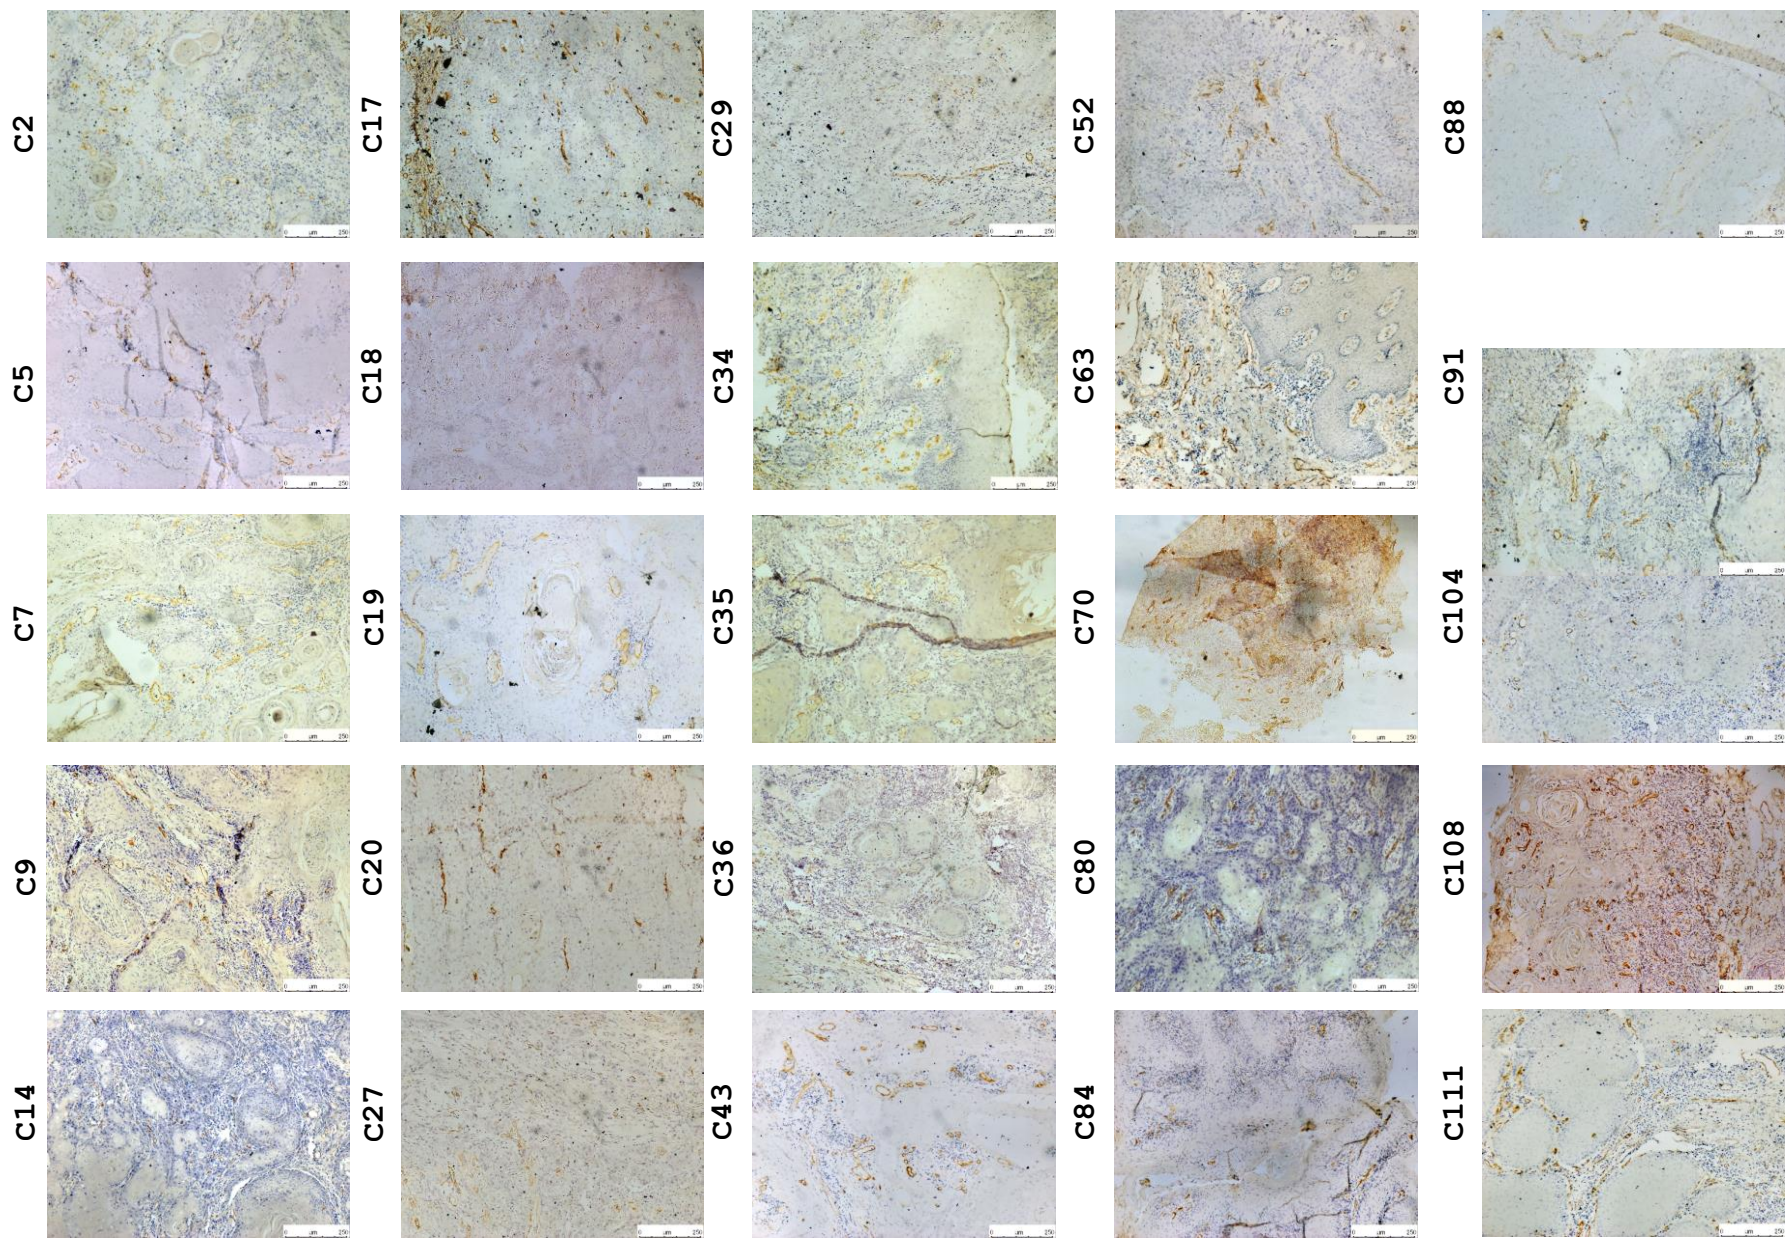

Supple Fig 7A: IHC staining with CD105 (Non-recurrent) ( n=25)



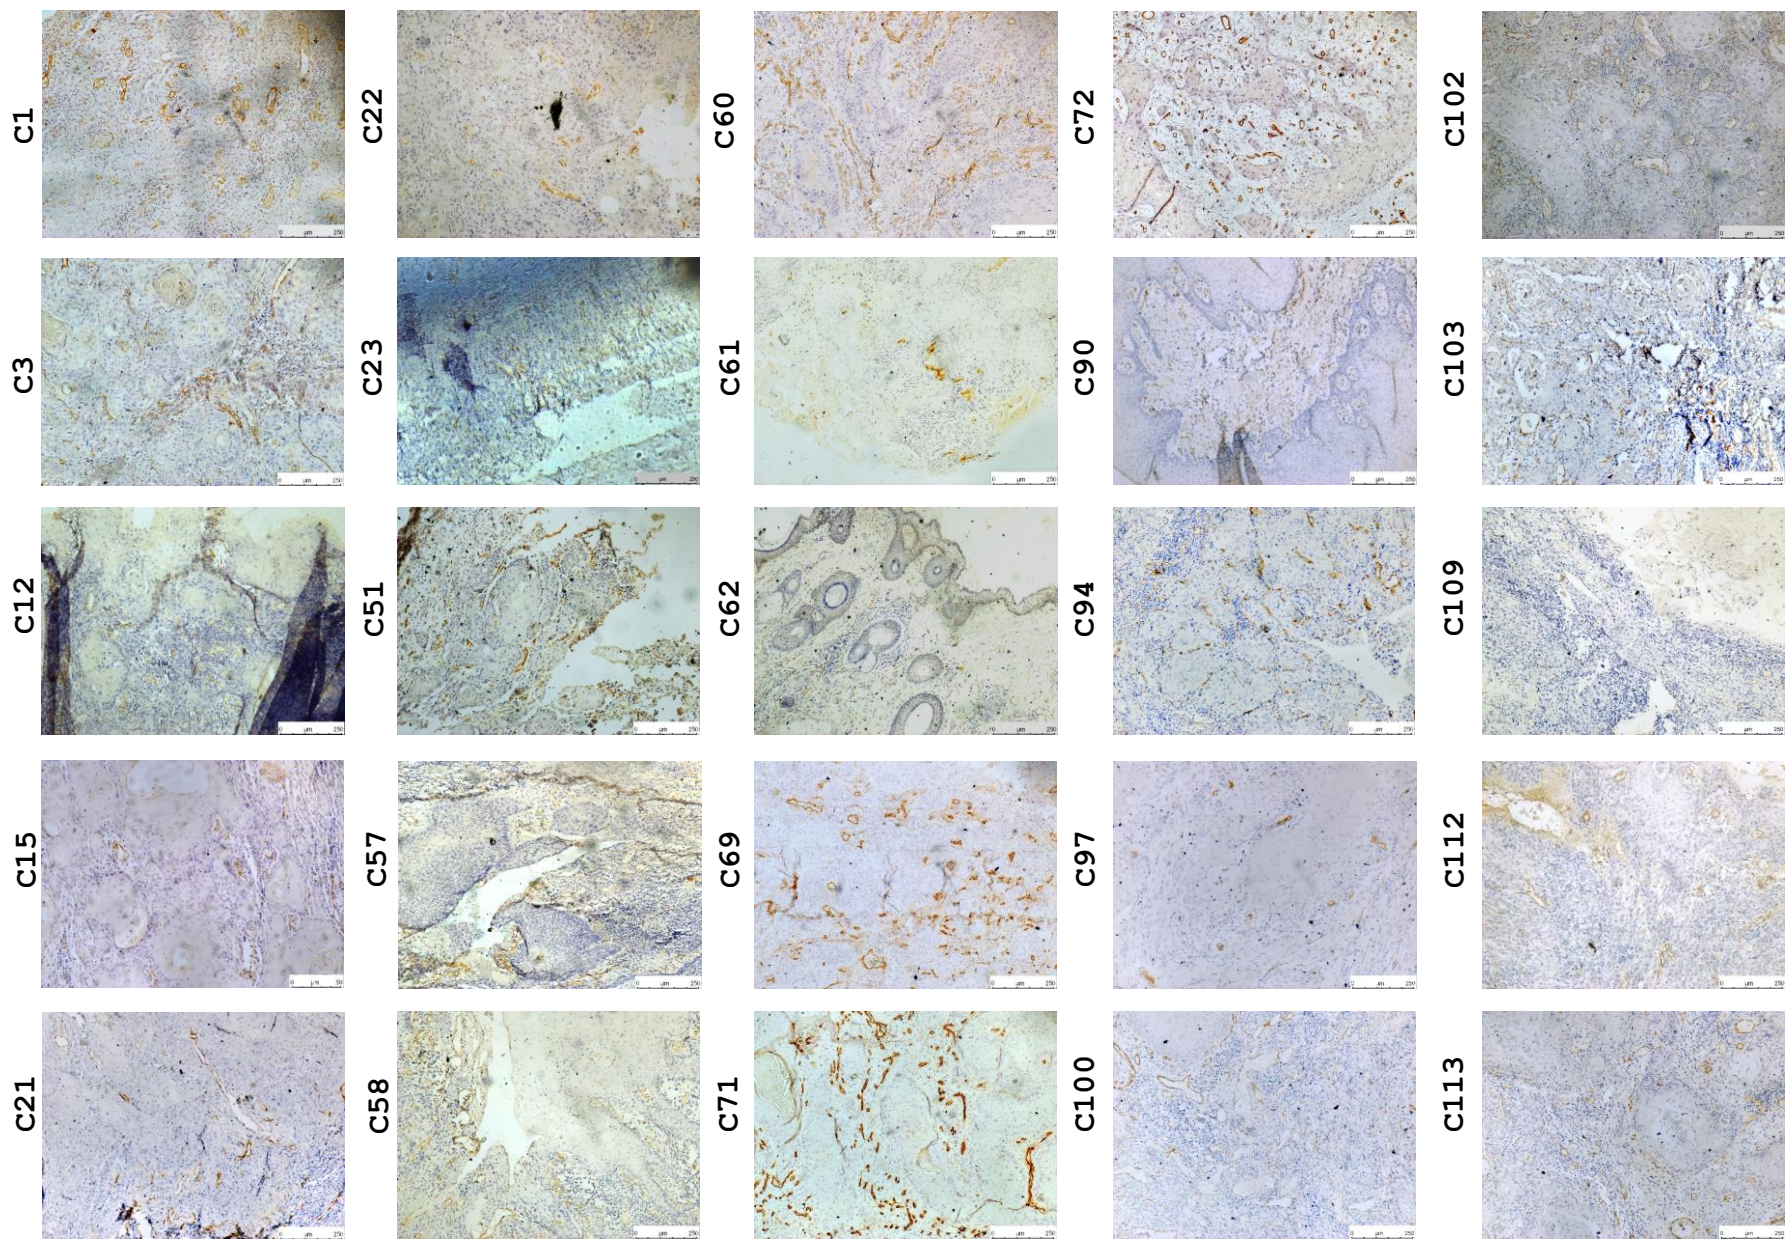

Supple Fig 7B: IHC staining with CD105 (Recurrent) ( n=25)



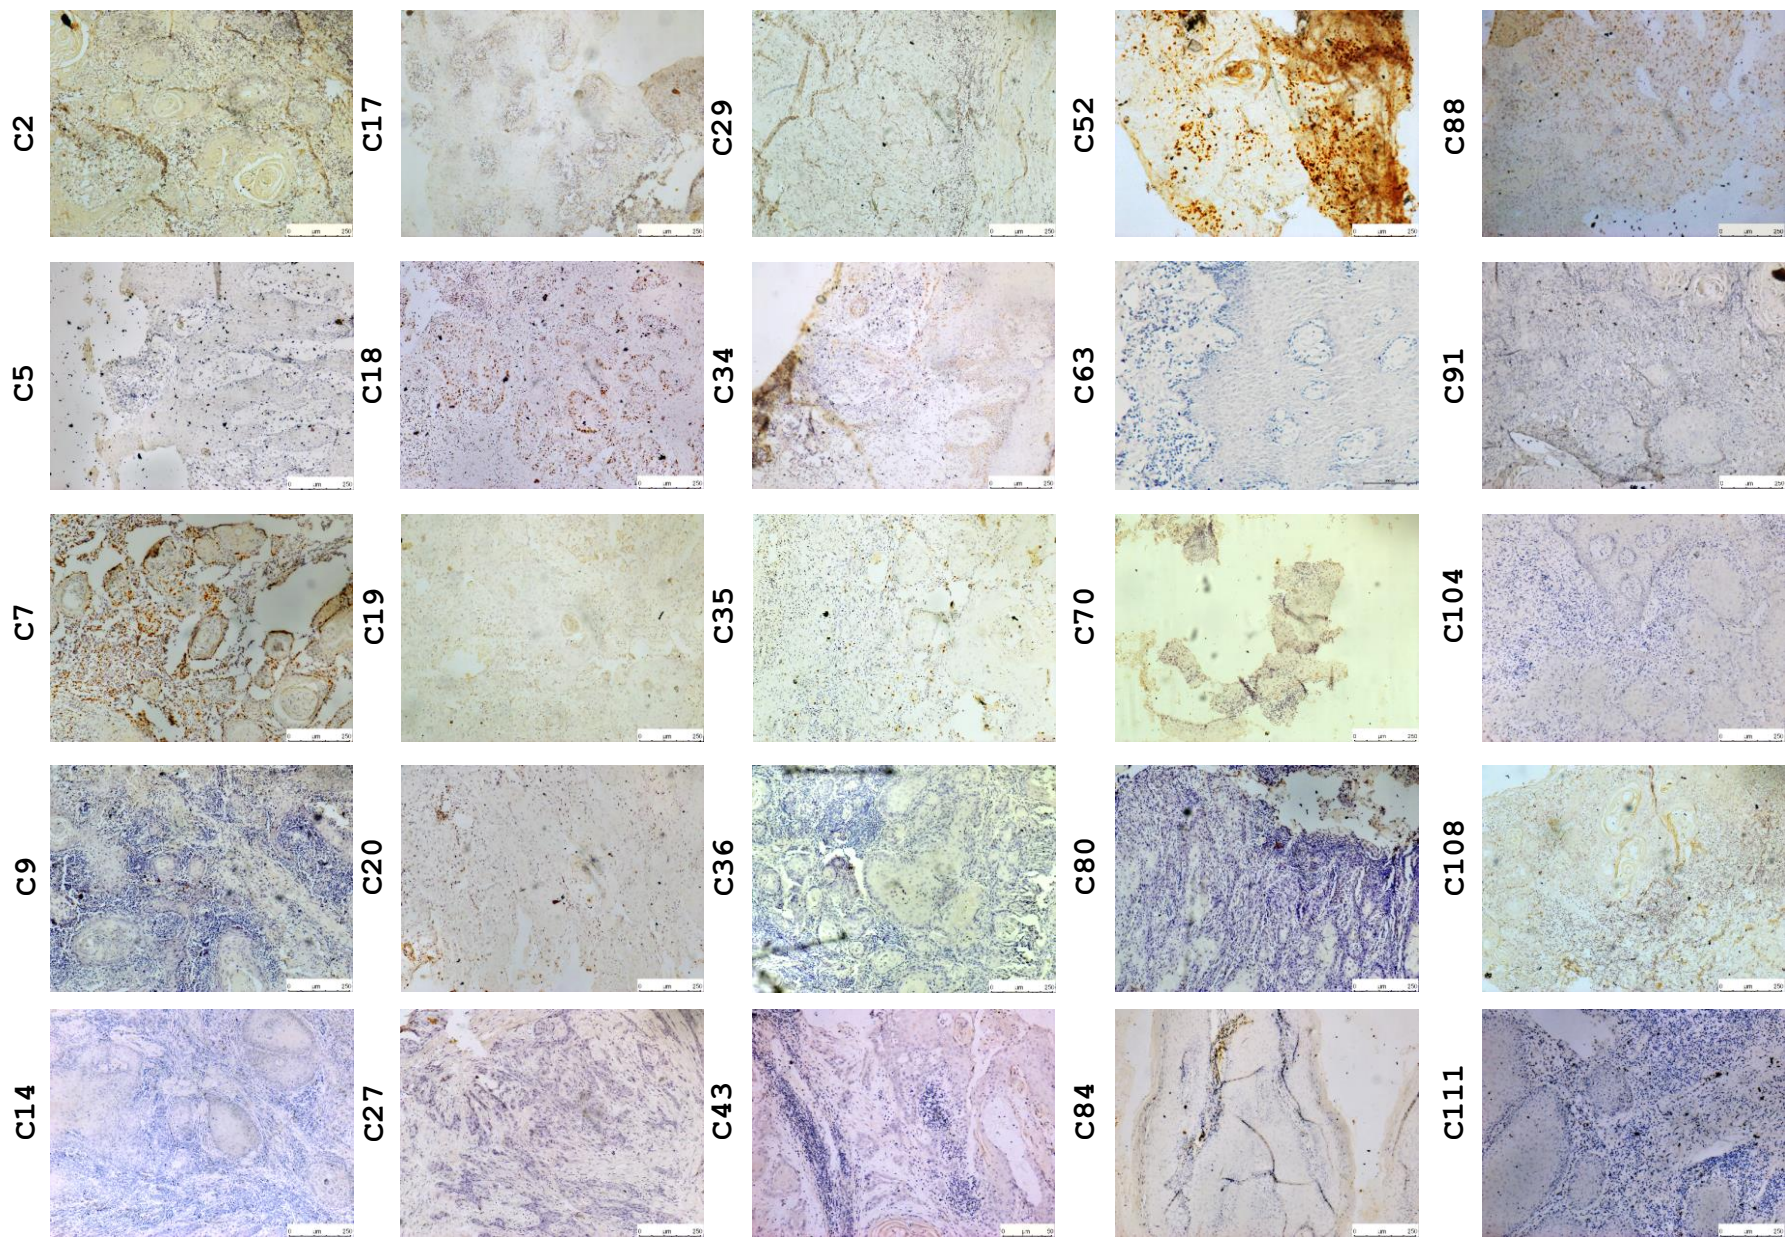

Supple Fig 8A: IHC staining with anti-Ki67 (Non-recurrent) ( n=25)



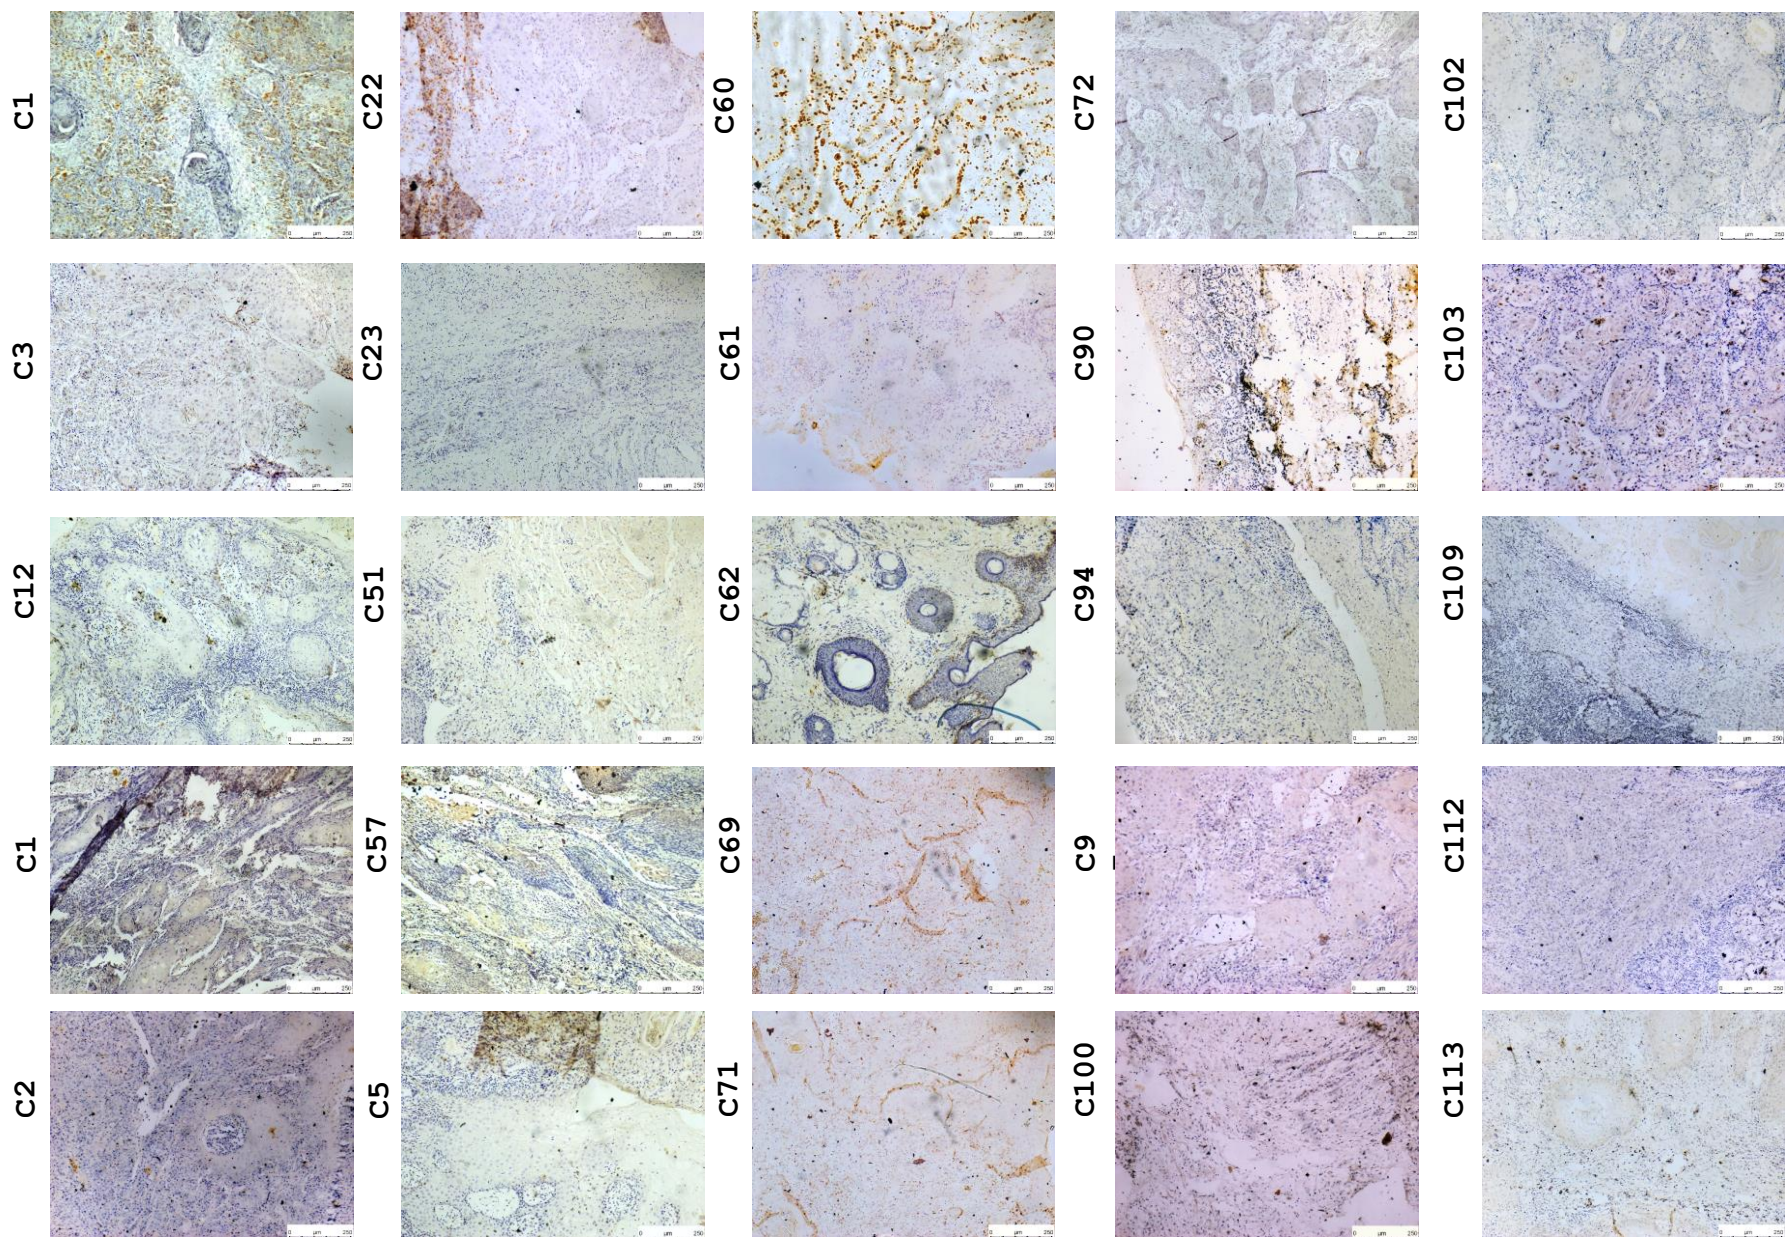

Supple Fig 8B: IHC staining with anti-Ki67 (Recurrent) ( n=25)



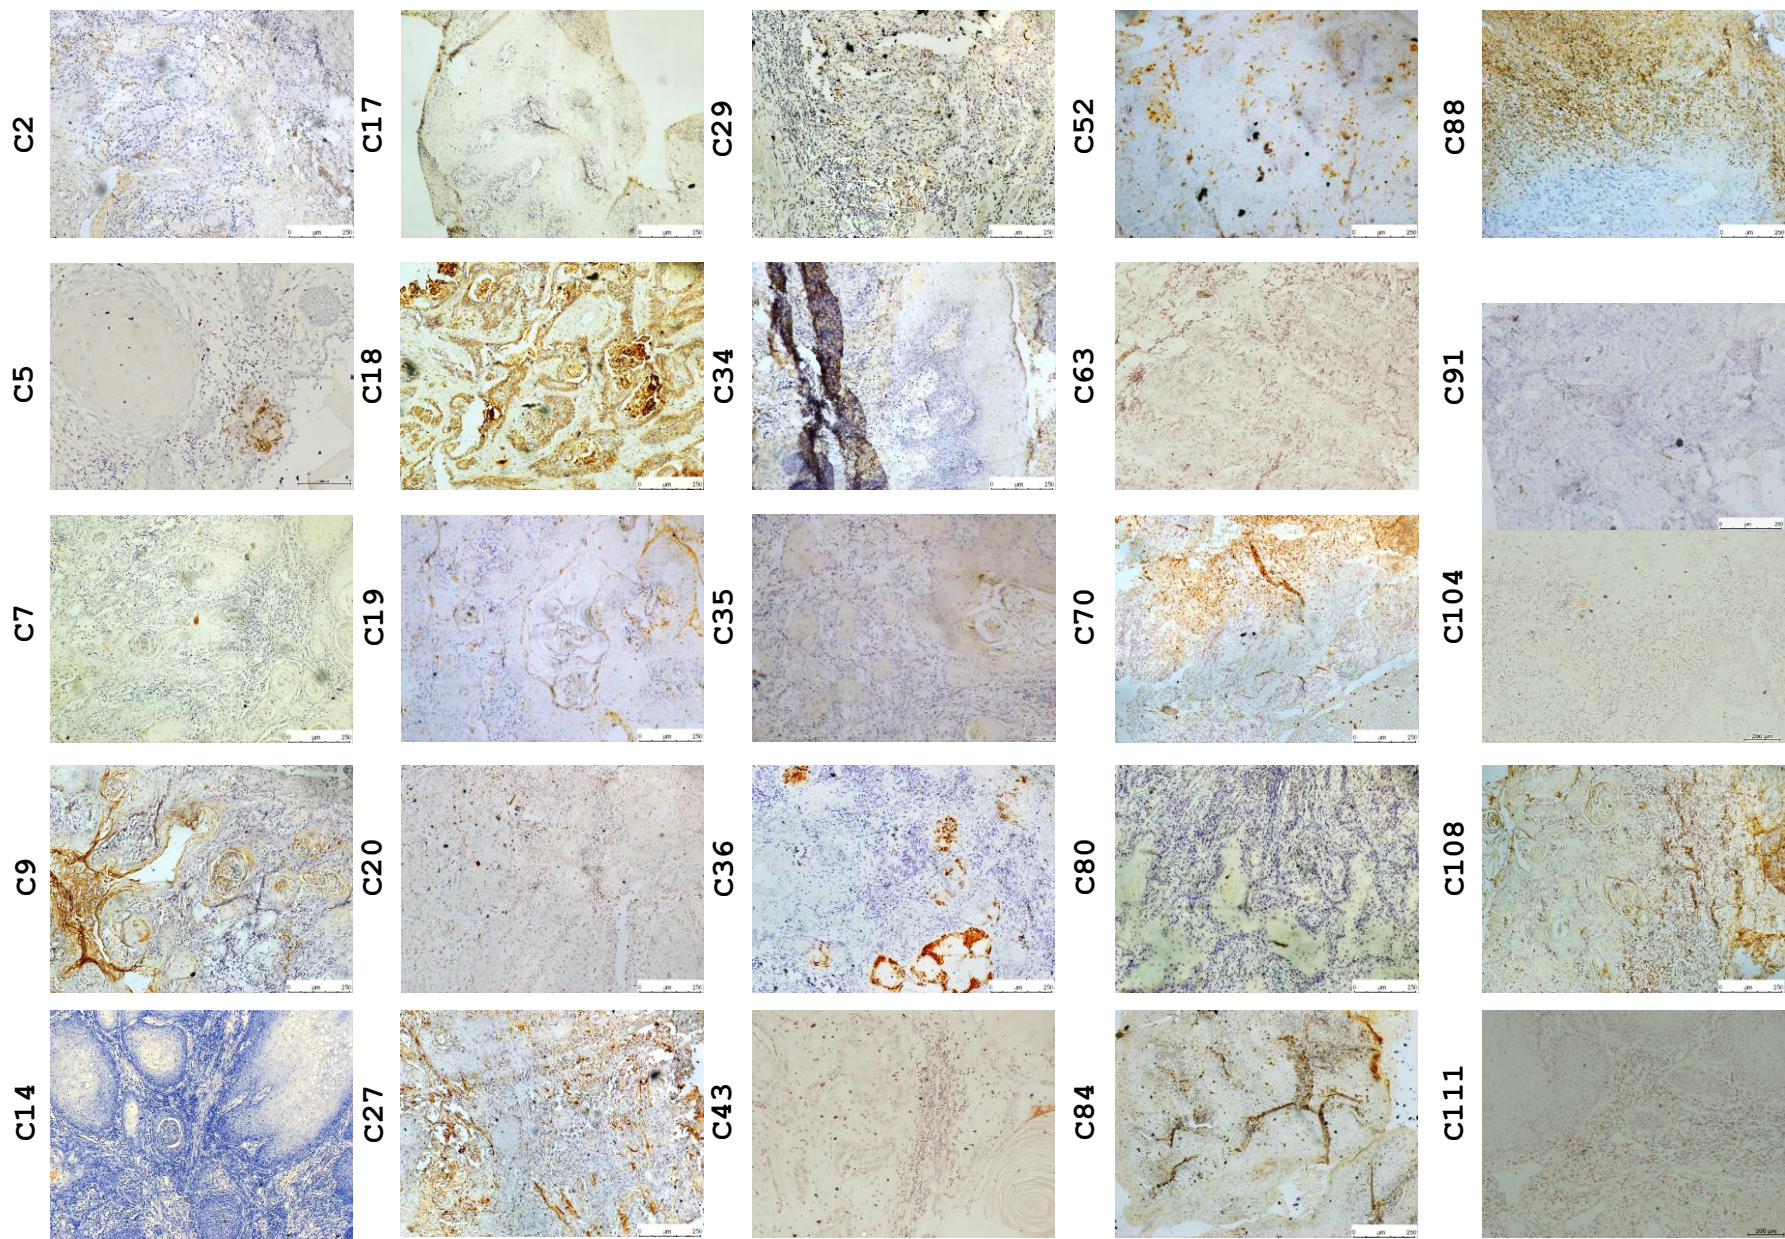

Supple Fig 9A: IHC staining with anti-MMP9 (Non-recurrent) ( n=25)



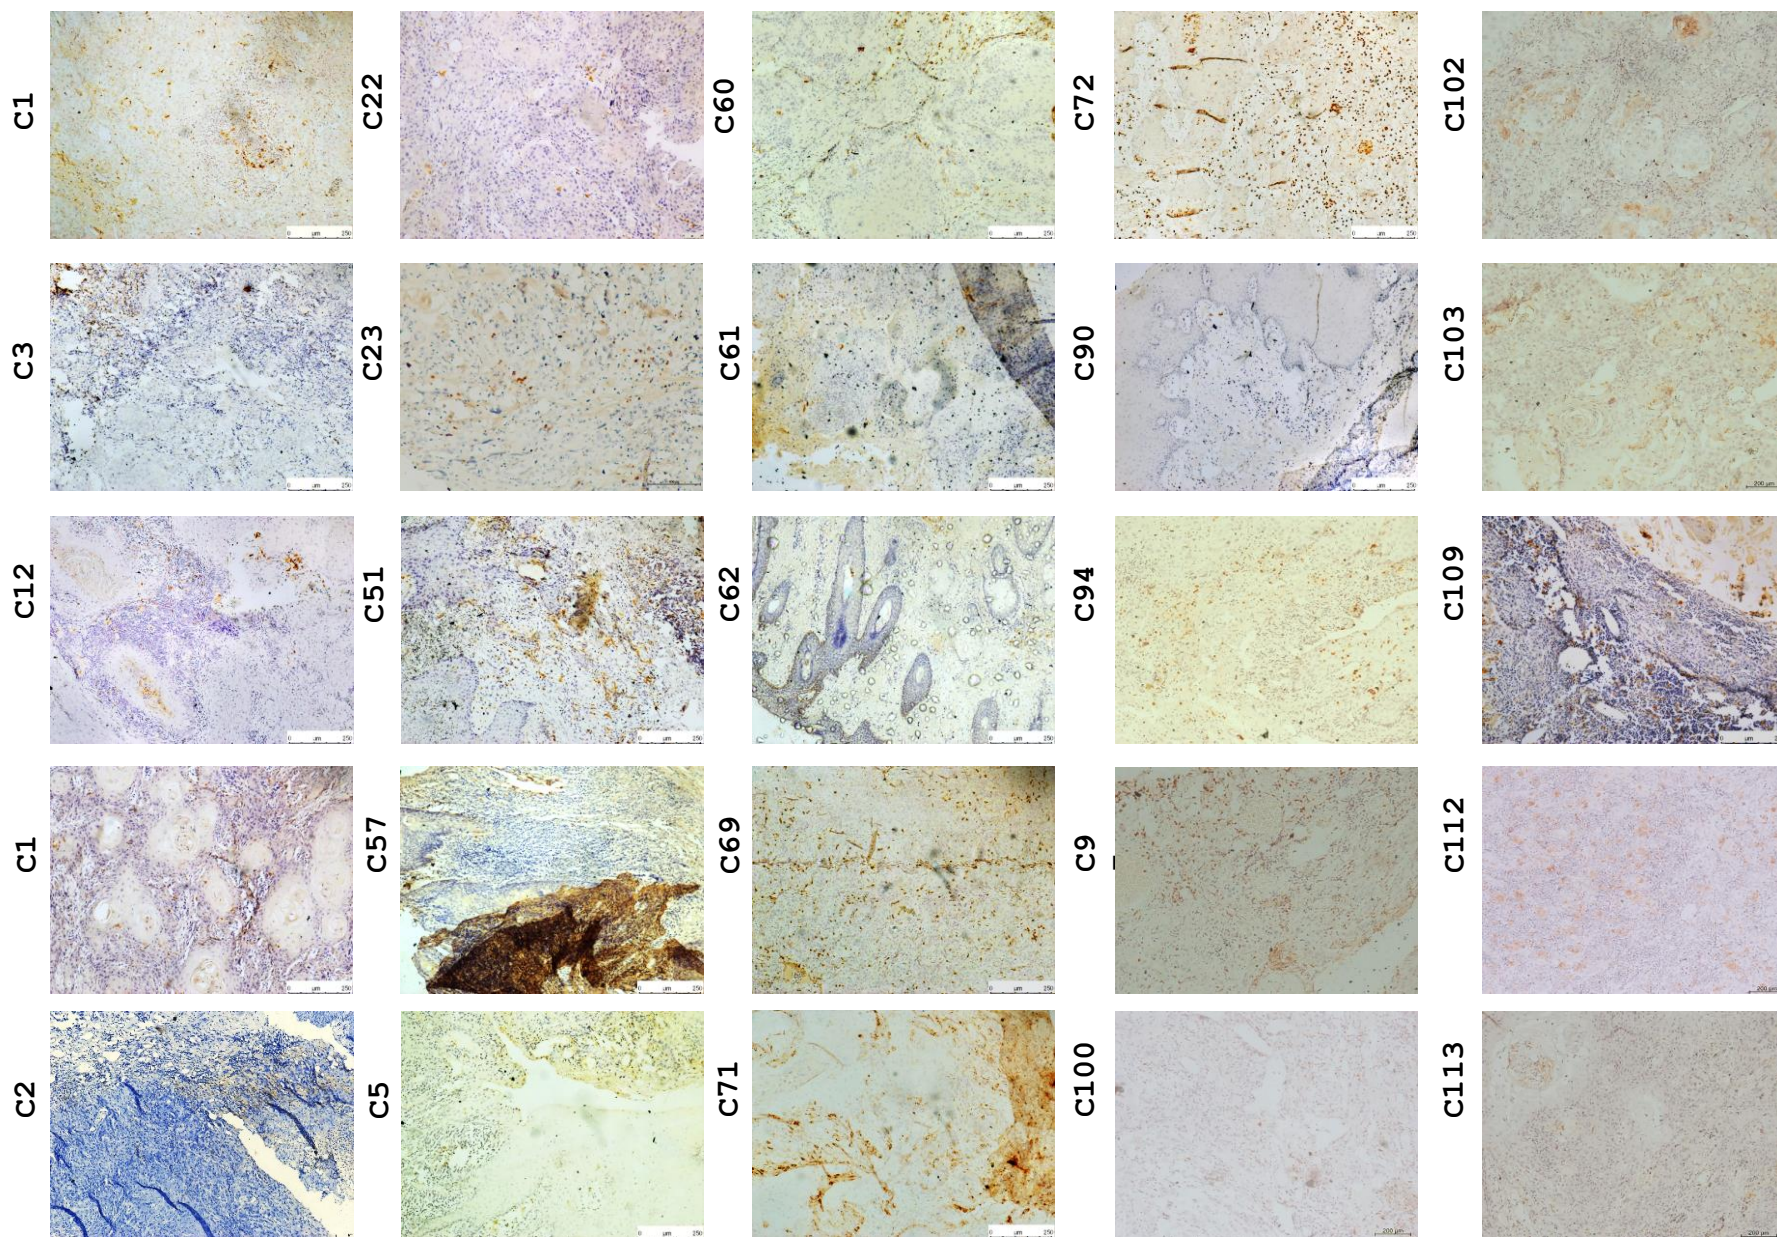

Supple Fig 9B: IHC staining with anti-MMP9 (Recurrent) ( n=25)



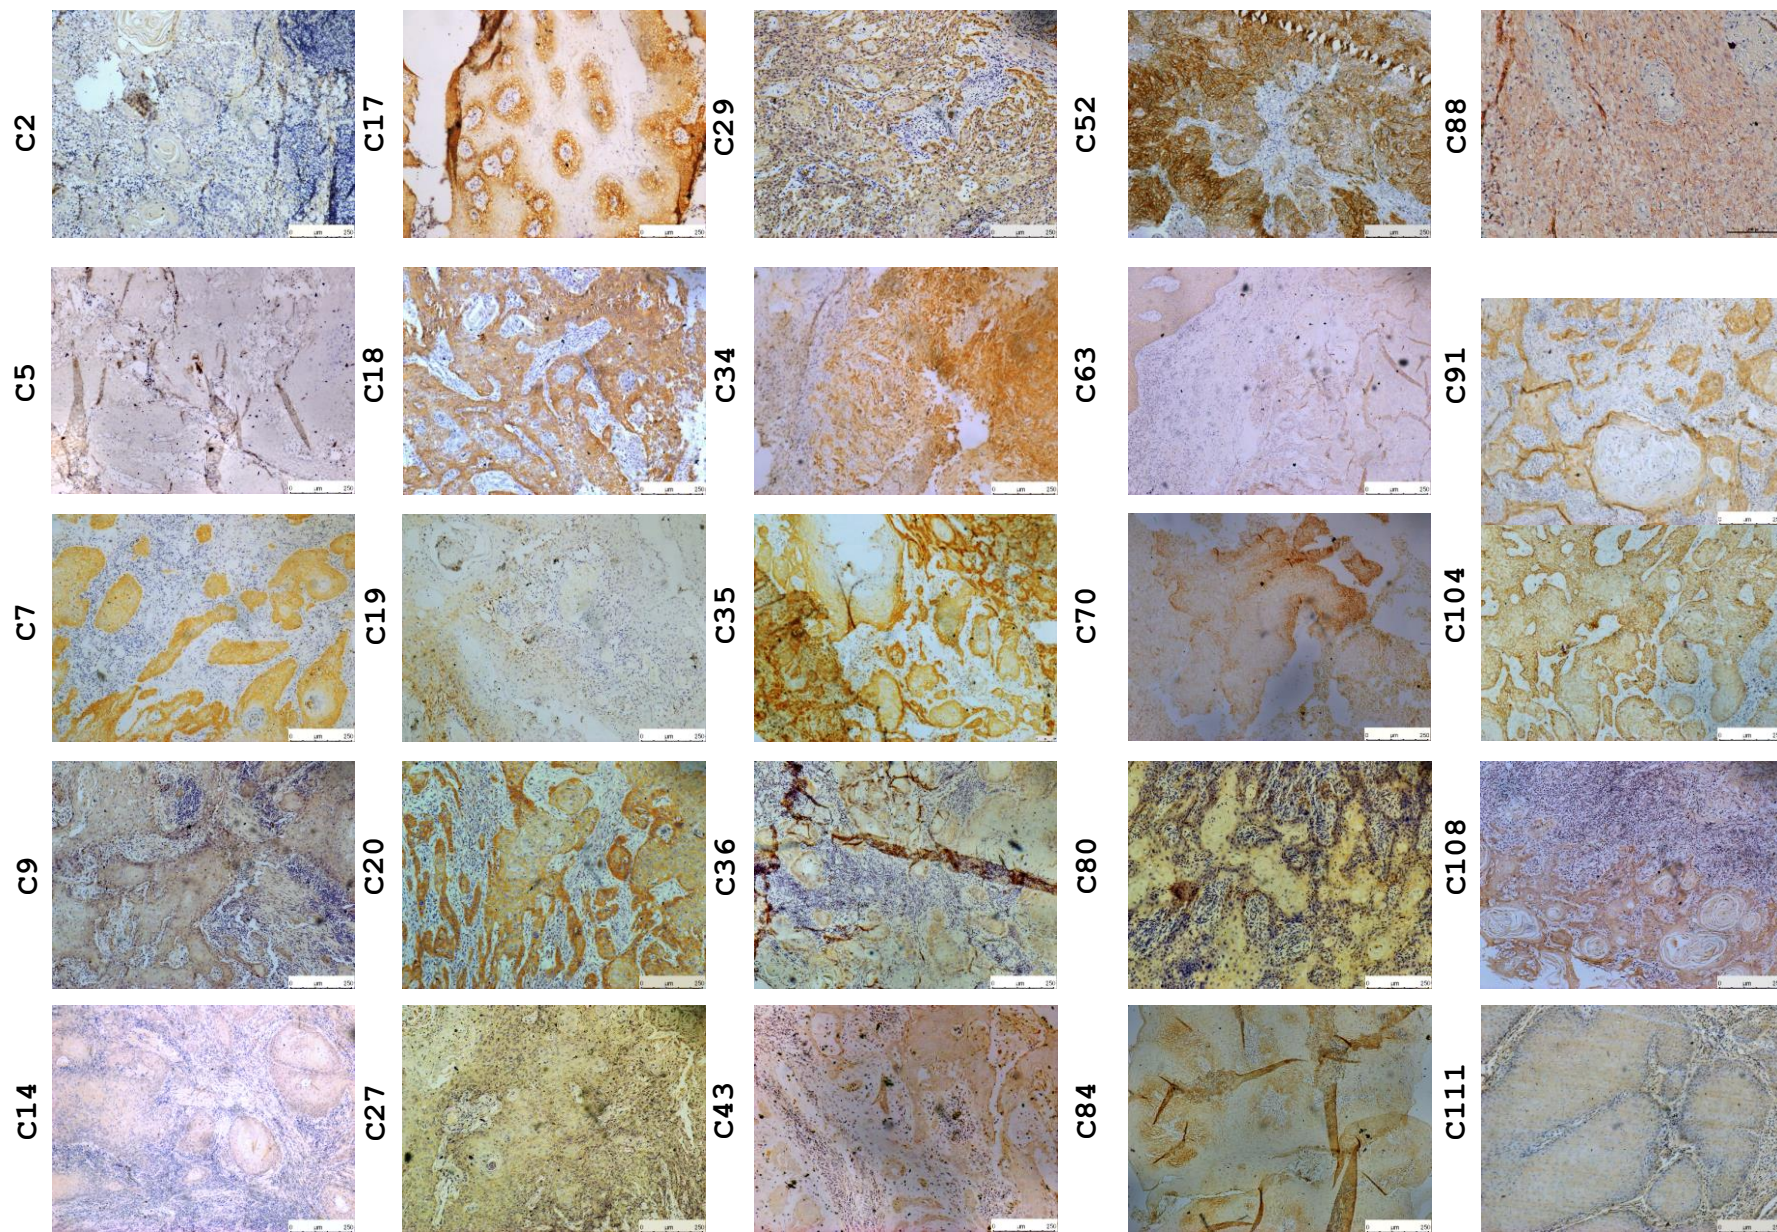

Supple Fig 10A: IHC staining with anti-EGFR (Non-recurrent) ( n=25)



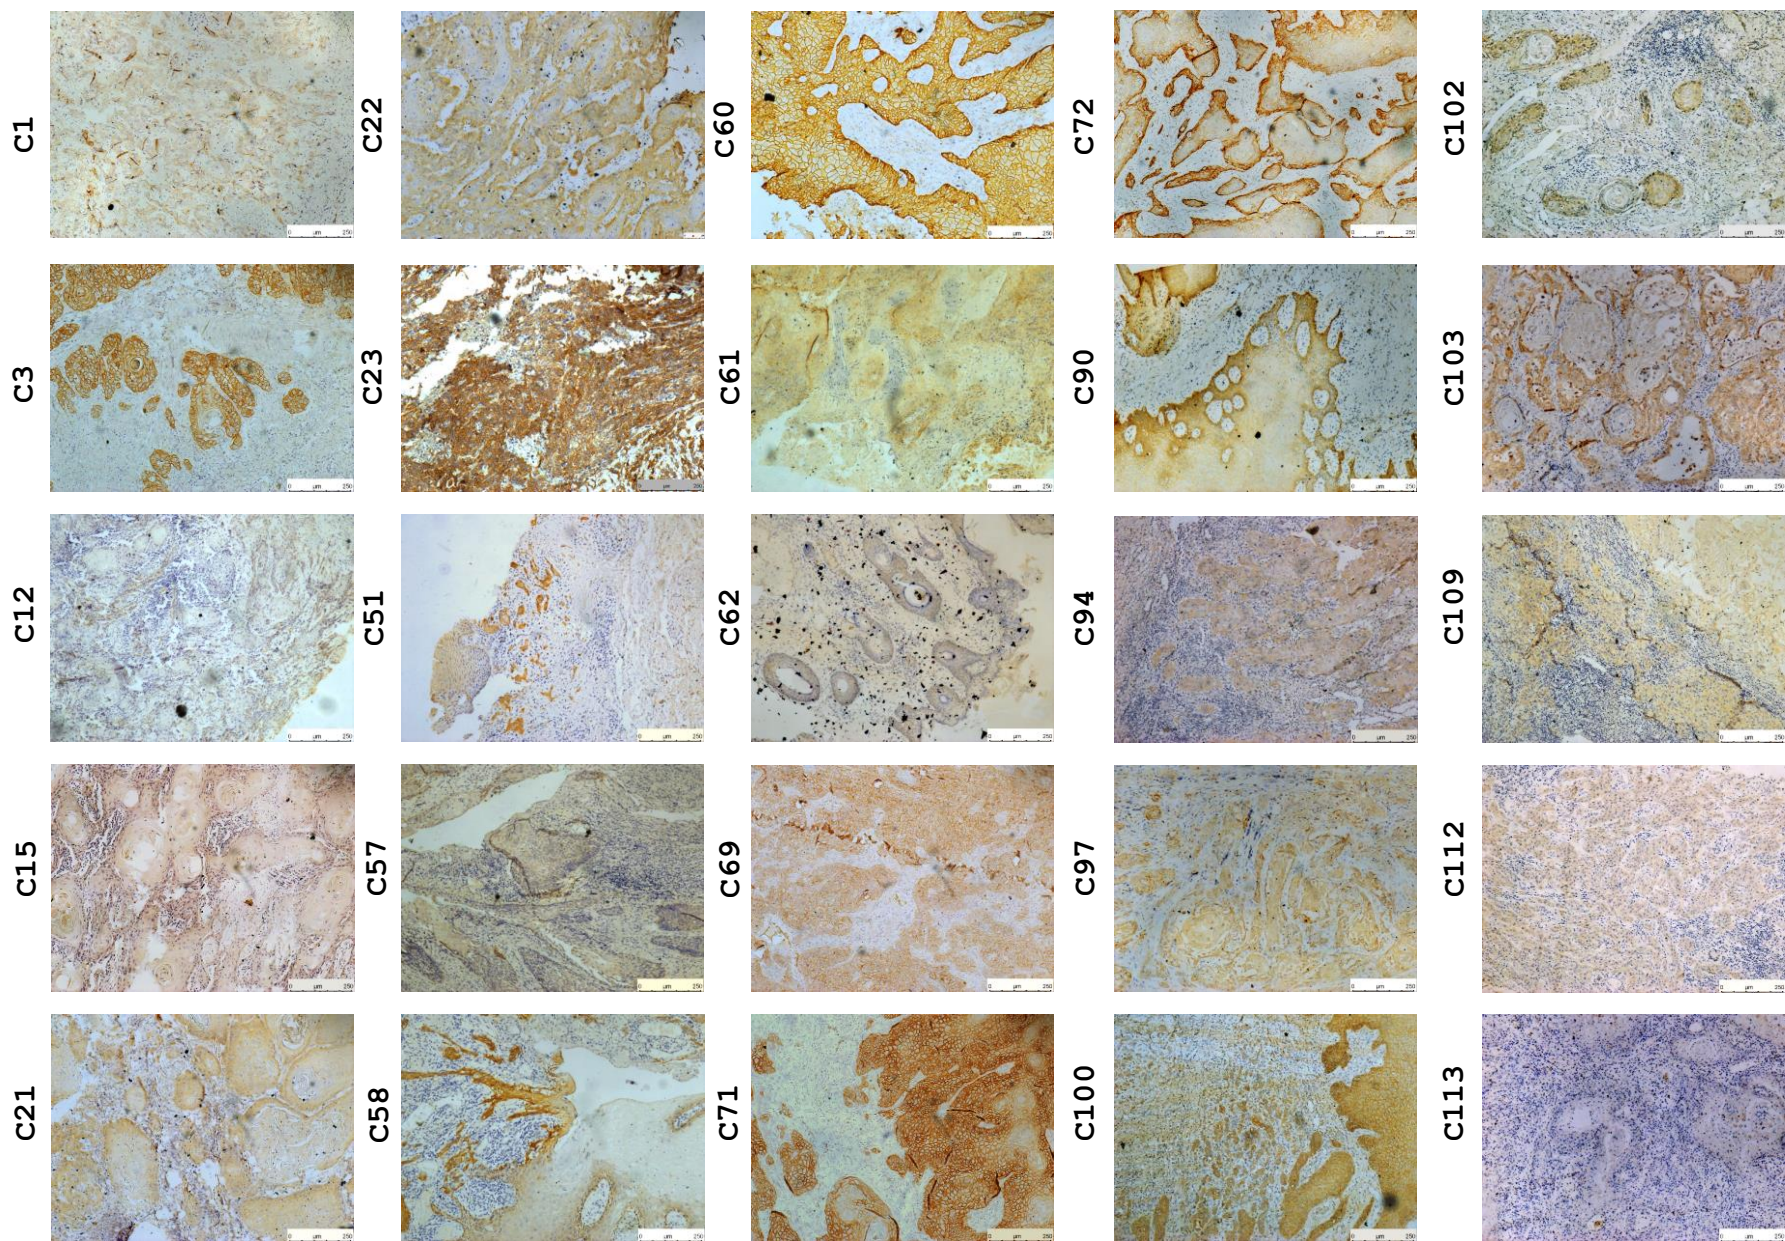

Supple Fig 10B: IHC staining with anti-EGFR (Recurrent) ( n=25)



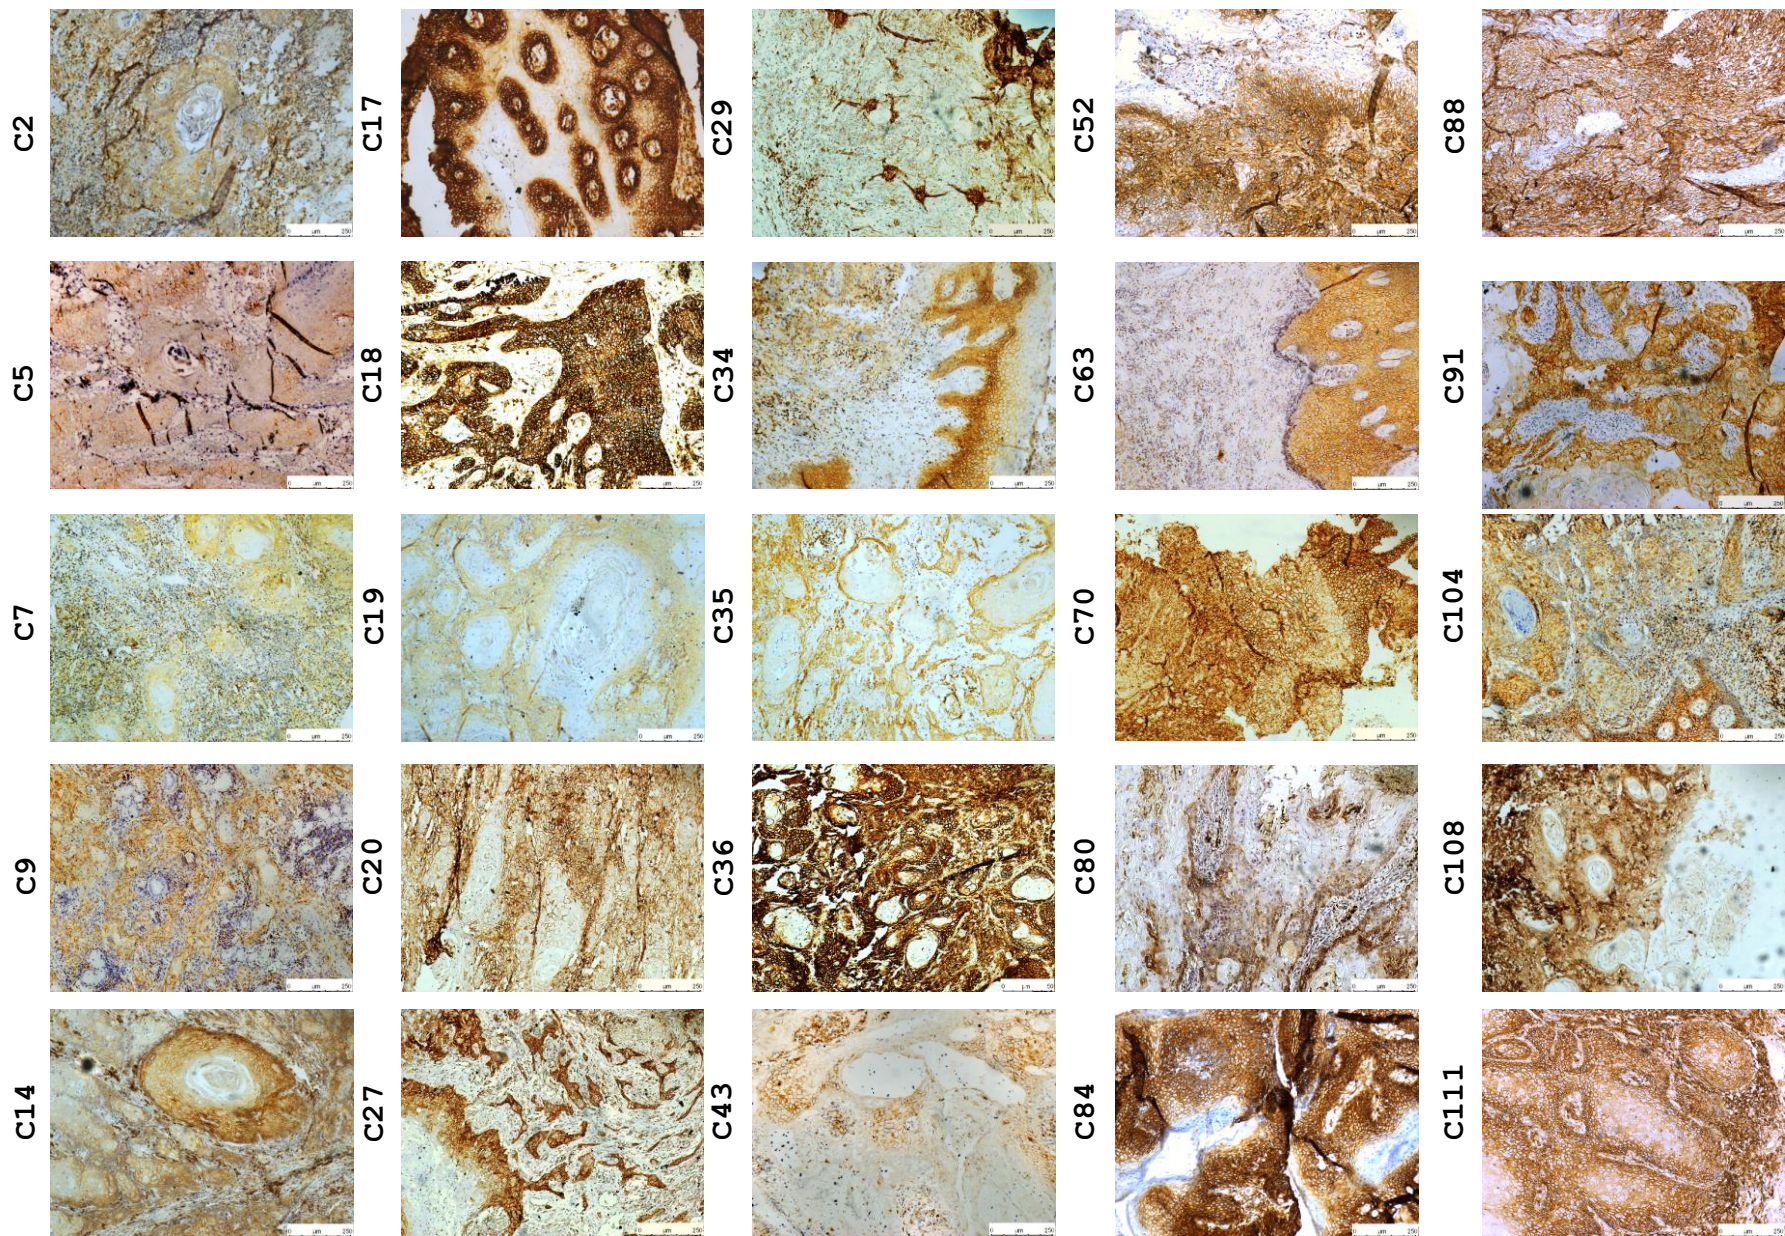

Supple Fig 11A: IHC staining with anti-CD44 (Non-recurrent) (n= 25)



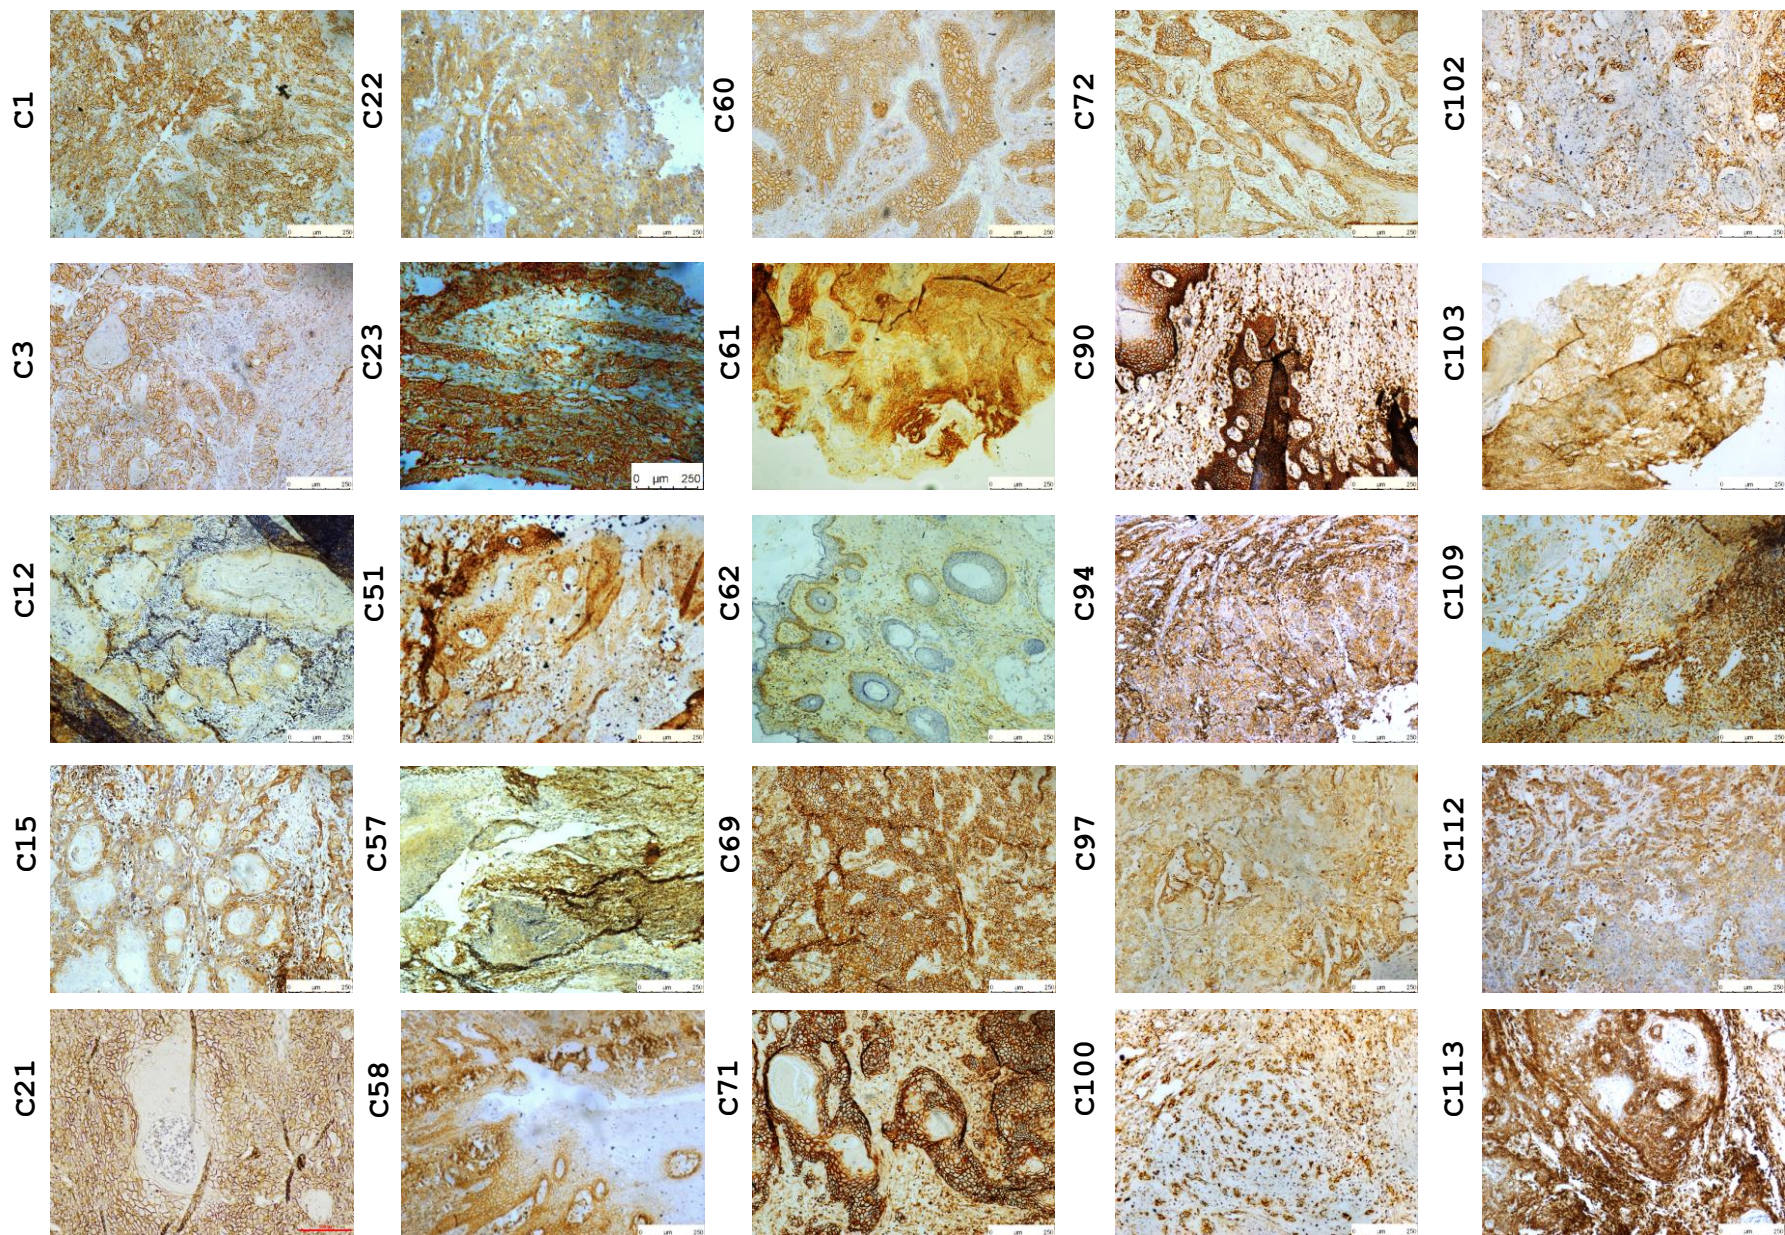

Supple Fig 11B: IHC staining with anti-CD44 (Recurrent) (n= 25)



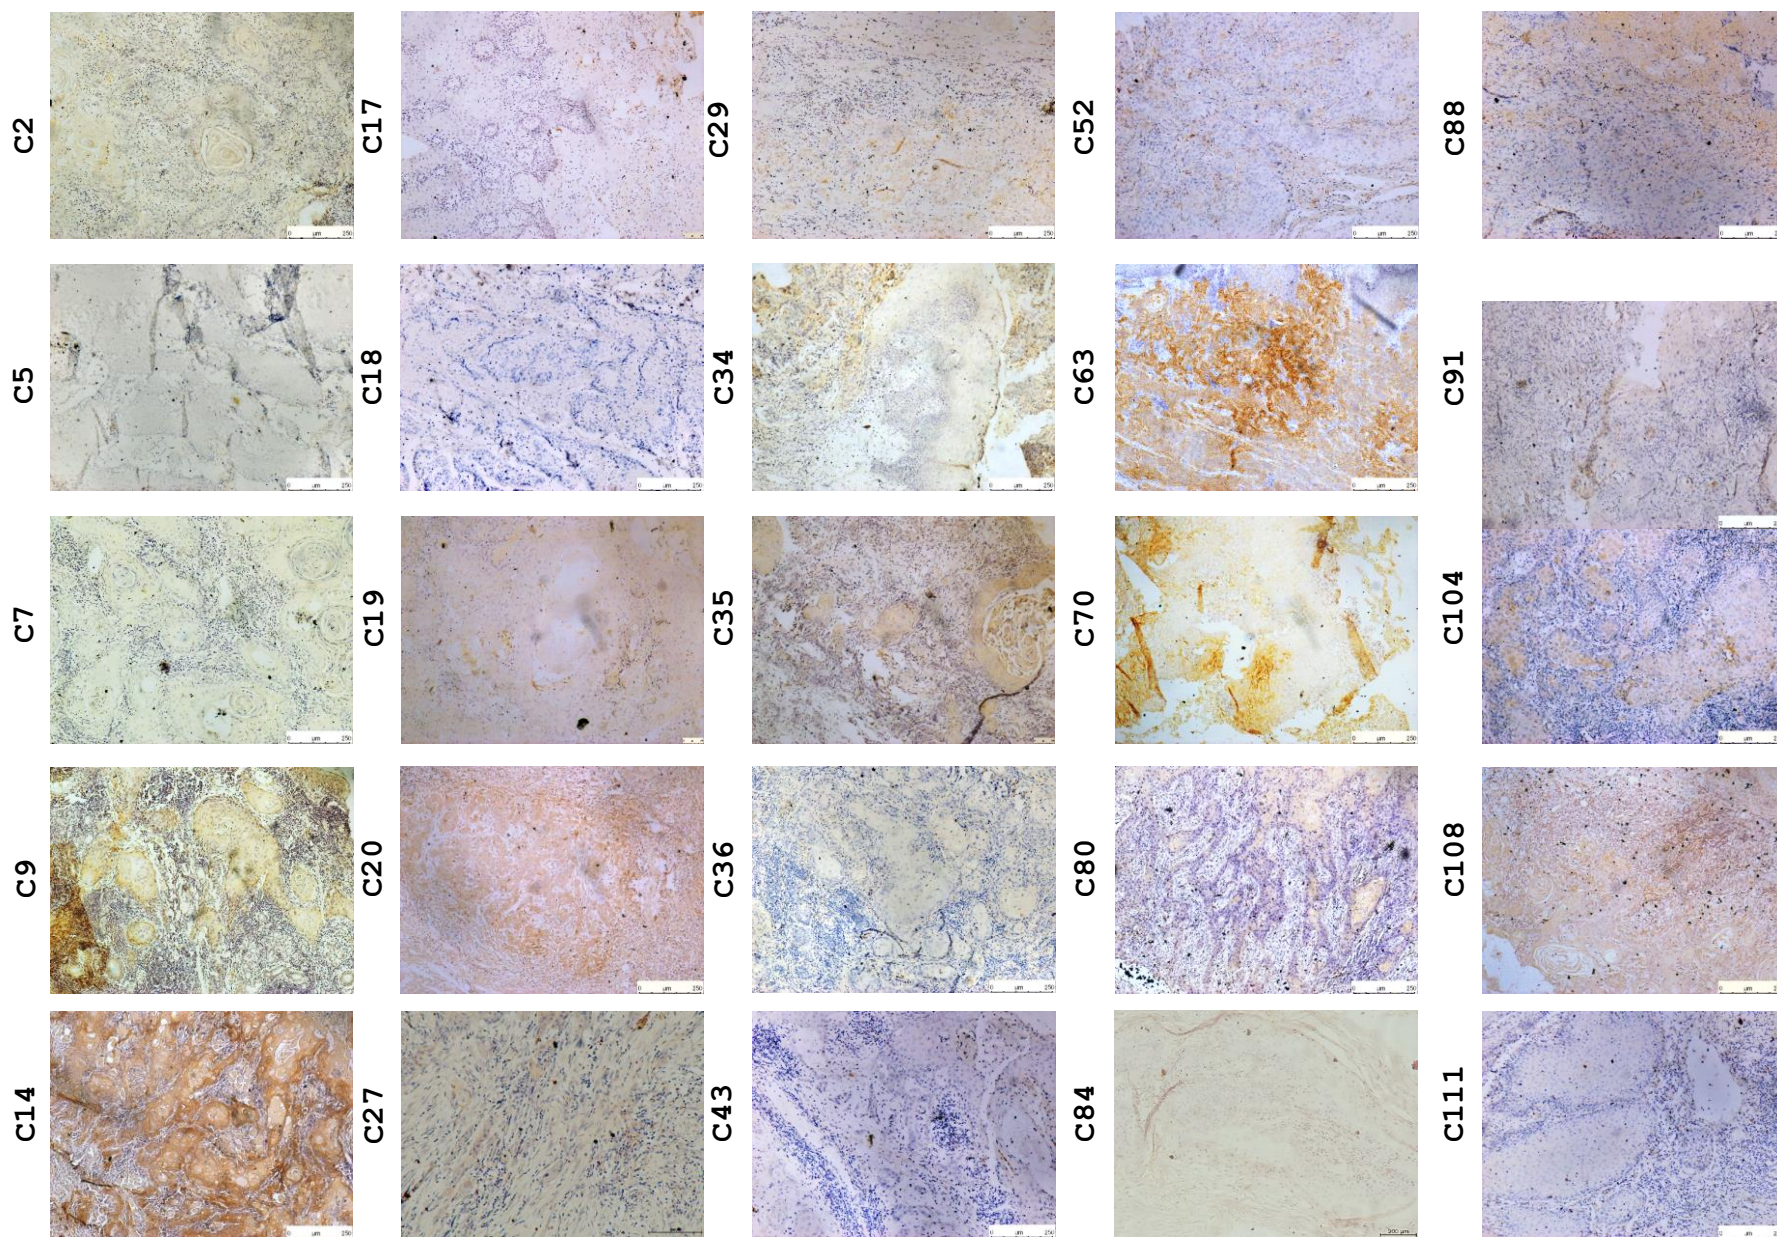

Supple Fig 12A: IHC staining with anti-PDL1 (Non-recurrent) ( n=25)



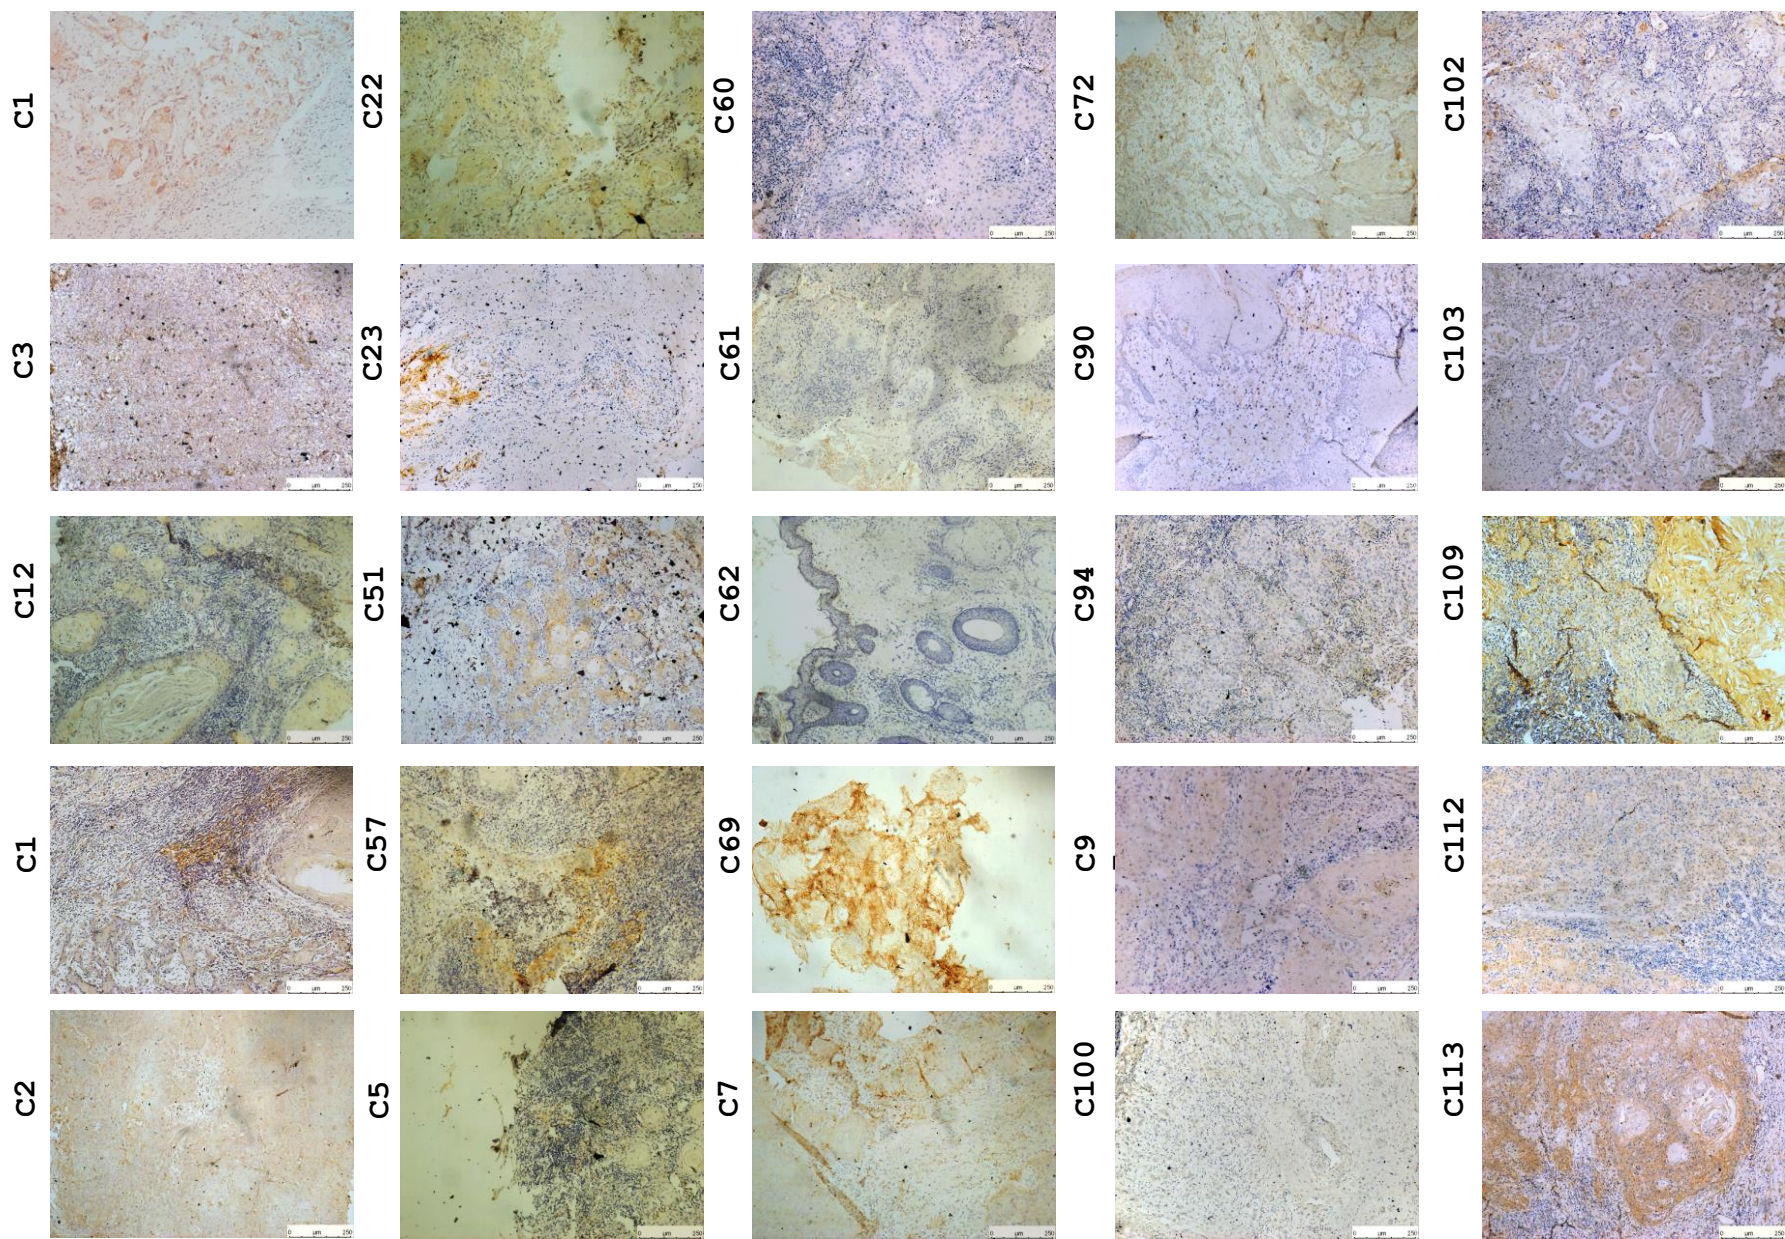

Supple Fig 12B: IHC staining with anti-PDL1 (Recurrent) ( n=25)
